# Supplementary material
Source: publisher figshare collection journal article supplement (https://gsajournals.figshare.com/ndownloader/files/29162163)
Supplement: Supplementary file 1 [file 29162163]

## Sheet: QTL=COM_GS
RIL	FLW-T1	FLW-T2	FLW-T3	HGH-T1	HGH-T2	HGH-T3	FBY-T1	FBY-T2	FBY-T3	JUC-T1	JUC-T2	JUC-T3	BRX-T1	BRX-T2	BRX-T3	SUC-T1	SUC-T2	SUC-T3	RSU-T1	RSU-T2	RSU-T3	FIB-T1	FIB-T2	FIB-T3
BxW001	73.9805	105.097	97.5549	219.436	229.649	293.119	24.5496	27.6786	37.6728	51.0091	58.775	63.6228	12.8108	14.5628	15.5618	6.85021	9.03732	11.0269	2.03987	1.70854	1.20312	16.101	11.8107	12.4031
BxW002	70.308	98.3752	92.2825	194.209	223.736	297.31	10.5594	21.9409	40.9265	47.2653	59.8593	67.4151	7.77816	10.5127	14.551	2.21231	4.71421	9.81405	2.94909	1.9141	1.32878	21.9184	12.8258	12.4392
BxW003	73.7619	99.981	85.1794	225.828	241.98	304.433	24.3111	32.239	60.0926	49.485	56.1594	68.5029	11.8388	14.7802	12.4733	6.52324	10.0447	8.73794	2.21218	1.77362	1.2549	17.1466	13.3241	11.8218
BxW004	67.6184	90.9365	72.0605	216.346	233.237	268.755	23.0874	28.3564	45.5065	51.9753	63.9543	71.1633	9.02826	11.8208	12.1295	3.31527	6.49282	8.43167	2.51694	2.16066	1.26584	17.2099	9.8636	8.95859
BxW005	77.9834	98.9394	106.388	231.38	265.509	329.272	24.5894	31.4758	57.7244	54.2779	58.0206	67.2303	11.248	13.5376	14.9423	4.72688	7.66043	10.5016	2.68461	1.87461	1.26772	16.1242	12.0775	11.031
BxW006	71.9471	98.7467	88.788	228.198	273.767	299.107	28.1788	32.1242	72.4336	53.8148	59.6579	66.943	11.1437	11.2759	14.9877	5.88708	7.37639	10.0424	1.93131	1.97191	1.349	15.5379	11.3473	12.2895
BxW007	74.5916	97.2682	87.8709	252.476	265.527	356.334	23.7763	32.8482	73.7953	51.6835	58.3644	63.8244	14.3254	15.8047	16.843	8.26297	9.67909	13.0295	2.10108	1.88334	0.973515	15.1686	10.1706	11.3431
BxW009	77.2354	102.392	106.054	262.894	276.318	328.241	33.5444	29.6643	53.0408	52.6172	59.7993	67.4968	11.4407	14.486	15.3374	6.28012	9.84427	11.399	2.24246	1.65896	1.10256	14.9772	9.88189	10.9428
BxW010	76.3236	90.2813	86.4625	236.158	275.864	335.464	21.475	39.7927	57.4388	52.6149	62.054	66.9956	10.3676	12.4785	14.6381	4.55547	7.18109	10.3331	2.73359	2.09459	1.22382	16.0403	10.162	12.2753
BxW011	75.3881	102.473	97.9112	244.417	249.176	330.94	21.8049	39.6455	41.614	52.3599	57.1161	66.7967	14.6197	14.8979	15.7135	9.05008	9.16627	12.0319	1.81098	1.96591	1.0098	15.3169	11.3131	11.5335
BxW014	72.74	104.312	92.1616	228.614	248.534	326.954	29.6525	31.2988	53.6121	56.3742	61.7741	70.0343	12.3372	12.3674	12.8535	7.03417	6.6786	9.00171	1.99728	2.12131	1.21999	13.2265	9.95836	10.2317
BxW015	73.0075	104.762	86.4458	247.997	269.654	307.528	30.4114	32.9667	55.2974	54.4802	58.3519	68.9653	9.68519	13.1053	12.0625	3.24736	6.75461	8.10704	3.05053	1.96336	1.32274	14.9142	10.6916	10.3001
BxW016	76.194	95.2736	86.1189	248.551	253.273	329.095	20.9814	38.0263	62.1284	48.0657	57.2586	62.9548	13.7926	14.5546	17.3684	8.02531	10.0105	13.0166	1.80579	1.52622	1.07802	16.3561	10.9543	11.7951
BxW017	71.0837	106.365	102.481	264.483	307.749	353.252	30.3751	43.9486	55.1187	55.5474	60.9612	68.4702	11.2825	14.9568	13.2615	4.41258	8.88939	8.80955	2.70034	1.64786	1.36512	16.5226	10.9529	11.4635
BxW018	76.6895	106.888	86.1485	232.985	246.603	317.647	23.376	24.1197	62.1748	51.0943	52.64	64.1329	15.3712	16.3172	17.2419	10.009	10.6483	13.9107	1.74209	2.24458	0.897516	14.6111	12.4708	11.0421
BxW019	72.1481	100.839	86.1224	196.767	236.58	305.551	18.8381	28.1232	57.2193	51.7138	55.2979	66.2819	13.8687	15.473	15.987	8.81543	10.0923	11.614	1.74471	2.01045	1.15002	15.4269	11.6174	11.7011
BxW020	71.3823	102.273	91.6348	224.145	256.485	308.379	25.4597	28.5014	53.955	55.1854	57.5825	67.096	10.1851	13.3	12.5347	4.3804	7.42524	7.8498	2.4989	2.06861	1.48104	15.6761	11.4517	13.199
BxW021	76.6251	105.239	97.6885	215.421	238.221	285.324	23.5122	31.907	48.2685	49.8564	56.8753	60.2268	12.7794	16.1566	16.5	6.84495	11.0893	12.4983	2.23907	1.79311	1.04952	16.0628	11.2934	12.8069
BxW022	75.8626	112.887	96.9208	251.592	273.564	332.836	36.0467	44.5348	67.4874	52.0928	58.0876	67.2577	13.7279	15.7072	14.7804	8.36079	9.83007	10.445	2.19057	2.18907	1.22415	13.7275	9.72002	11.1184
BxW023	76.6788	112.898	103.717	233.61	257.617	293.069	26.8315	33.2459	50.782	51.6097	58.2939	65.5998	13.0095	15.5543	14.6118	6.64873	9.96332	9.90178	2.47863	1.85381	1.32033	16.522	11.6585	13.0528
BxW024	76.8261	107.34	100.793	268.739	298.311	340.792	27.7265	38.9404	49.8068	52.7762	56.3286	63.4594	15.651	15.8972	14.6662	9.72045	10.3278	10.1662	2.0776	2.00003	1.26908	15.4754	11.5627	11.7487
BxW025	69.7165	107.391	88.1914	219.493	260.25	315.538	29.0012	33.339	45.5163	50.6032	58.093	64.5666	14.2579	14.7442	17.5244	9.38908	8.06217	13.0189	1.68036	1.95612	1.10135	16.0957	11.3956	12.2583
BxW026	71.1565	101.695	80.9156	233.773	266.394	311.818	24.439	29.0101	45.4337	55.378	62.1209	68.4828	13.7404	13.3337	14.1664	7.05617	7.49389	9.53057	2.48564	1.92727	1.32208	14.9976	10.7564	10.4955
BxW027	71.1994	91.2383	85.9071	207.345	239.984	308.596	26.6901	24.9607	45.9589	51.4513	61.7564	71.4847	8.30047	11.5012	11.7075	2.92195	6.3928	7.61711	2.40446	2.03219	1.43673	16.7504	10.3811	10.7239
BxW028	73.0431	84.1257	85.034	252.827	238.099	298.578	21.5499	25.8907	38.7552	49.26	59.2812	67.2686	12.4686	11.2546	12.0598	6.40981	6.53344	7.93273	2.0071	1.9814	1.3696	17.93	13.228	13.0715
BxW029	75.6561	110.559	104.023	218.581	245.818	267.028	27.9956	39.5873	71.4074	48.9176	57.4273	63.6314	9.28752	14.3539	13.9729	3.99071	8.96671	9.31137	2.87147	1.95336	1.34669	20.074	11.4544	12.4454
BxW030	76.9217	102.017	86.0989	246.124	270.917	328.417	39.0038	37.3145	57.955	51.8329	56.509	67.94	12.4643	13.6811	14.4978	7.6007	9.51258	10.2707	1.93527	1.89154	1.21779	16.6205	12.4583	11.9964
BxW031	77.3031	104.684	104.245	231.479	250.368	331.185	28.4194	32.9932	65.9985	53.7246	59.5958	65.3677	11.7525	13.5257	14.0101	7.06165	7.02756	9.30312	1.95912	1.99587	1.37099	15.1575	10.7806	10.9247
BxW032	70.8684	105.712	100.425	207.356	244.179	303.167	25.0536	27.4352	55.0753	52.3987	62.5	66.5563	7.57258	10.5101	13.5451	2.25065	4.77668	7.9274	2.5638	2.39141	1.61606	17.5807	10.2622	11.0657
BxW033	73.2791	103.55	86.5573	239.038	273.488	312.715	25.5377	35.0652	48.7386	53.1978	60.4045	65.3351	11.8881	13.7788	16.7004	6.07241	7.96342	12.0974	2.36246	2.40945	1.14413	16.4276	11.9246	13.7305
BxW035	69.216	81.5657	88.5349	198.737	243.742	309.834	15.1302	24.5931	55.3762	47.0332	54.2603	66.8542	9.4264	15.1072	15.651	3.92987	10.3072	10.5881	2.48917	1.68985	1.3027	18.2678	10.3977	10.8922
BxW036	73.8476	107.713	97.9949	224.128	276.285	329.379	22.1603	35.8627	59.9412	52.6516	59.5025	65.9019	14.7612	15.6155	15.3222	7.63079	10.2686	11.1826	2.32774	1.80554	1.15052	16.23	10.1876	11.8586
BxW038	72.1618	100.639	85.5243	242.664	273.771	336.908	21.1683	33.6357	68.8047	51.4809	57.064	65.6242	13.0103	14.743	16.5244	6.78604	8.74488	12.2122	2.49941	2.16739	1.10887	16.8221	11.7155	12.2333
BxW039	69.9271	80.9506	78.501	193.885	187.832	262.488	16.0324	11.8595	38.9643	49.4533	63.5601	66.9341	10.0198	11.1519	15.0953	3.79771	5.9855	10.5586	2.74674	2.60312	1.24447	18.9116	12.7759	12.1349
BxW041	74.3072	86.5401	78.5604	186.483	157.286	288.782	20.0277	18.1194	34.9191	44.994	54.5627	68.6507	13.5927	12.5733	14.0642	7.34368	7.4084	10.0092	1.90751	1.71187	1.19217	16.3611	11.7369	10.7025
BxW042	70.9735	84.6766	79.8286	227.985	210.942	288.682	21.7059	22.0787	48.7072	49.824	60.3315	68.9559	10.4645	11.6869	11.8389	4.63299	5.63772	7.54011	2.31142	2.09358	1.49402	17.8554	11.848	12.4038
BxW043	72.2259	89.9824	83.8102	251.441	259.897	324.071	26.8637	35.1712	56.2724	50.4126	55.7743	61.1222	12.2162	13.6572	17.1943	6.51805	8.85826	12.8977	2.12362	1.84561	1.04918	16.9273	11.7299	13.2707
BxW045	69.6716	92.1502	87.6839	237.541	235.768	307.235	23.3119	23.9908	46.2249	53.3137	60.4199	67.0536	9.14997	14.152	16.0725	2.62846	8.27014	11.3601	3.30807	2.28604	1.1957	17.2311	11.7019	12.6456
BxW046	76.3988	108.299	98.7493	234.506	273.936	339.398	26.808	33.0289	58.5972	53.0259	59.2871	69.2684	12.4165	15.1067	14.0795	6.16504	8.54963	9.7115	2.23866	2.1998	1.30859	15.2383	9.66445	10.3192
BxW049	68.1954	92.276	80.0756	222.242	223.655	306.002	25.8724	24.9345	55.7502	52.0723	60.6566	71.2455	9.42463	12.2498	12.7327	4.17774	7.26438	8.74444	2.29998	2.13473	1.30584	16.8702	11.2452	10.8644
BxW050	79.0808	110.601	96.9127	216.399	287.283	343.303	19.5873	40.2084	76.7109	46.9697	54.1061	58.5594	13.0189	16.7952	16.7289	8.3731	10.9184	12.6815	1.69338	1.70284	1.0428	16.502	11.7814	13.0223
BxW051	72.5853	100.153	87.1317	234.471	252.154	297.649	25.9138	28.8147	45.245	52.1775	62.8432	71.927	9.51436	9.31189	10.1713	3.54387	3.49348	2.51032	2.56793	2.19517	1.95072	16.9556	10.9861	10.414
BxW053	69.0672	102.982	93.3332	207.146	229.948	299.618	23.5126	34.1806	56.2448	48.7707	61.9108	70.1637	8.0702	12.1288	10.9714	2.63898	6.17485	7.24088	2.85732	2.1859	1.38021	18.8674	9.99103	11.1132
BxW054	75.9218	108.318	104.03	221.977	273.492	320.125	31.5913	39.4577	66.3234	57.3255	58.8862	66.5425	7.28195	13.2256	13.9906	2.59899	8.44587	9.78424	2.33702	1.72277	1.24084	15.0268	12.7744	11.0464
BxW055	75.7959	101.325	106.004	246.804	253.938	324.593	32.8574	30.8202	43.8968	53.9485	59.8735	65.4496	13.1966	13.6689	15.0693	7.28759	7.70884	10.9948	2.13168	1.94448	1.14842	14.3078	10.6278	10.0878
BxW056	73.9944	103.007	88.5528	221.341	261.021	312.767	20.6413	31.0518	46.0776	49.8399	56.1337	64.6945	9.75587	13.8802	13.9084	4.87439	10.0315	10.0195	2.09613	1.79945	1.20288	17.2295	12.2126	12.8454
BxW057	75.8258	96.7522	90.0373	227.682	266.069	301.257	26.3099	34.1547	58.331	55.318	57.5805	67.8506	10.9623	14.0707	14.6847	4.74855	9.05461	10.2304	2.72221	1.64818	1.24044	14.4435	11.5548	10.8798
BxW058	74.3275	94.9231	91.3146	228.232	249.645	328.276	26.6006	33.9144	56.5978	51.2581	58.3738	66.4468	10.1558	14.5078	14.9545	3.81297	8.69775	10.6974	2.79529	2.12509	1.18255	16.6406	10.7332	11.7804
BxW059	67.6166	87.5135	76.9381	203.709	202.525	301.873	13.1441	17.3852	57.7296	46.1982	62.4515	68.1829	10.959	10.3204	14.5877	5.66797	5.72939	10.6547	2.08662	2.05962	1.19559	18.5805	11.7454	10.4997
BxW060	72.0382	85.0192	78.6463	209.775	198.454	291.337	21.6323	23.7114	44.5905	46.3763	63.7531	65.9461	10.4105	9.08793	14.4926	4.76117	4.79245	10.7945	2.33343	2.06705	1.06157	19.1117	11.0207	11.5524
BxW061	77.9865	108.454	101.296	210.347	233.056	300.666	22.0742	33.7833	68.1731	54.3683	58.0457	66.7622	11.6188	13.5458	13.8399	6.65132	8.06416	9.9037	2.06891	1.99045	1.21321	15.8612	10.6742	11.2798
BxW062	76.9858	103.072	96.744	243.335	269.112	308.219	25.621	37.2446	60.5622	54.1348	58.8579	66.7642	12.3044	14.1494	13.9911	6.41697	8.42043	9.71452	2.54454	1.69124	1.27015	15.5911	10.6198	11.1249
BxW063	69.9245	99.5261	86.4226	224.384	250.731	299.051	17.7219	31.2608	61.9275	53.5739	63.0898	67.6381	9.83554	12.2321	14.7262	3.69129	6.17243	10.1257	2.68438	2.1355	1.27369	16.9193	12.1551	12.4679
BxW066	75.0047	113.322	99.0835	210.464	272.123	317.818	27.2559	39.6687	55.3784	52.6365	61.0452	65.0992	10.8904	13.6074	14.8667	4.97176	8.94816	10.7119	2.42285	1.60486	1.16299	16.8528	11.2765	12.4525
BxW068	76.2775	109.109	98.1071	209.825	263.73	307.564	27.9925	39.52	51.4942	50.2206	59.774	67.4059	12.21	13.3455	12.3452	5.9159	6.98875	8.57742	2.45144	2.09728	1.24104	15.9695	11.1963	11.8142
BxW069	76.6706	94.1596	83.6657	245.796	281.51	333.885	31.0778	32.3814	66.1438	50.3224	59.2914	70.9253	13.4465	14.605	15.3664	8.43936	9.58719	11.4576	1.84037	1.83709	1.09782	15.8546	10.8263	10.6781
BxW070	67.691	83.5507	77.1373	225.126	200.123	294.319	22.3744	9.06776	48.9331	52.0951	61.2628	67.2461	7.52015	10.37	14.1363	2.47611	5.4818	9.9672	2.64379	2.09036	1.22511	17.5297	11.5712	11.9212
BxW071	69.8307	87.8715	79.66	220.371	216.623	290.486	14.4643	25.63	37.0835	49.6766	61.2866	68.572	9.28539	12.0467	14.6627	3.1745	5.70005	9.74431	3.1238	2.35451	1.3503	19.4771	11.9135	11.4345
BxW072	70.7128	84.8968	82.2232	228.976	217.344	300.086	21.9256	19.7886	59.4762	48.6935	59.5905	63.1178	12.3804	10.7471	15.8318	6.71751	6.63088	11.951	1.91489	1.49996	1.06235	17.048	11.5798	11.7714
BxW073	75.2923	101.694	89.0609	184.199	209.74	285.342	14.6783	27.1478	65.2664	47.2384	58.756	62.5934	9.91158	13.4762	17.531	4.24027	8.49487	13.5054	2.3407	2.05005	0.973522	19.2642	11.948	12.6867
BxW074	79.7616	105.93	95.9466	235.509	291.452	316.306	33.4727	51.931	53.0712	52.025	59.1714	70.2865	12.8183	14.8242	12.3335	6.80631	9.31978	8.56959	2.15374	1.86087	1.28051	14.1361	10.1446	10.6591
BxW075	69.6711	80.0146	81.0479	224.825	206.496	285.603	25.6466	25.9437	38.962	50.5674	59.7622	71.0168	10.5402	10.3251	9.81808	4.55663	5.29891	5.72981	2.27654	1.97236	1.62951	17.5741	11.4192	11.0342
BxW076	71.2588	93.4599	89.4757	248.597	258.52	283.739	29.7634	35.2853	57.5045	54.0131	62.3664	68.8872	11.9936	12.8756	13.7191	5.17071	6.41123	9.61827	2.78793	2.1084	1.25764	15.809	10.5211	12.3397
BxW077	75.3286	108.32	100.48	237.898	293.469	322.007	34.123	40.7822	67.8813	54.3056	59.5114	65.8992	10.948	13.0284	14.6955	4.75894	7.34086	10.1118	2.9017	1.89514	1.30518	15.1191	10.1862	11.7037
BxW079	74.5555	104.518	101.965	273.236	287.394	328.412	32.0147	36.8795	65.8062	60.2551	60.85	69.3449	10.6004	12.9468	12.7168	3.71627	6.80125	8.42652	3.0492	2.43574	1.36409	13.9431	12.1351	10.6728
BxW081	75.4463	109.32	105.58	221.528	249.767	329.104	28.8599	36.2769	76.3571	50.3985	57.3604	62.3407	13.6632	16.1744	15.8135	6.58189	10.7664	11.0956	2.41573	2.20145	1.22986	15.6368	11.5785	12.6143
BxW082	76.0006	107.565	95.9782	249.959	296.157	329.398	25.4195	24.3695	68.529	50.7289	61.3372	60.7518	11.9853	12.2487	16.1767	5.97546	6.77843	11.8095	2.23293	1.98374	1.18361	17.1286	10.9541	12.9376
BxW083	79.9584	108.17	87.6511	263.478	301.227	334.559	31.8375	42.6027	76.399	47.0781	57.4466	61.8386	17.0246	15.4307	17.7292	11.5654	10.7007	13.6068	1.55325	1.85069	1.01185	16.2219	11.8125	11.8992
BxW084	72.0437	103.969	103.786	200.658	239.625	307.962	18.7937	34.6266	74.5005	51.9317	60.407	65.6507	8.67692	13.4249	15.1364	3.13536	7.98721	10.8944	2.83122	2.13	1.15661	17.6259	10.9836	11.365
BxW085	73.6903	99.3452	89.579	224.125	270.569	327.838	23.758	37.63	70.6736	49.111	53.6103	67.4292	14.4757	17.1441	17.7205	8.66722	11.3982	13.027	2.16115	1.70524	1.10364	16.6175	10.4319	11.6302
BxW086	71.6487	99.4042	101.814	183.27	199.181	205.477	16.2507	24.7219	25.5264	51.9458	56.842	70.7752	11.1083	14.6947	11.9468	5.61371	7.71595	7.3196	2.20628	2.47479	1.53407	16.045	10.5878	10.3083
BxW087	75.2261	102.413	84.8811	222.163	241.366	289.528	22.0243	24.5091	34.5931	47.3365	57.5594	68.8444	12.8614	13.481	11.8821	6.62094	7.63316	7.51507	2.12147	2.42438	1.47424	17.7866	11.7514	10.796
BxW089	69.6992	86.9074	82.446	215.231	221.689	268.185	28.7111	22.9361	15.2304	55.3668	59.7939	68.9514	9.72373	11.6455	12.5846	4.02324	6.1302	8.5727	2.25913	2.40622	1.28337	14.356	12.2641	10.347
BxW090	75.7084	99.7766	87.5844	300.497	297.837	357.072	51.7165	35.9083	55.4869	51.6585	56.5531	64.0176	15.3948	14.3234	16.5757	10.229	9.20269	12.964	1.69907	1.93996	0.908544	14.4719	11.5118	12.1892
BxW091	73.5434	87.7434	82.2162	254.14	226.278	320.27	32.0155	26.6335	63.5502	52.8693	62.3669	64.0417	13.7217	10.6321	16.3958	8.31619	4.5038	12.1754	1.99378	2.73144	1.09514	14.8082	10.781	12.0304
BxW093	76.592	94.3939	84.9508	256.383	239.846	312.934	33.8237	38.6126	73.7365	55.8944	59.6473	69.9201	12.4166	13.45	13.7509	4.89444	8.51413	9.58763	2.69996	2.02596	1.30563	14.0166	11.3213	10.4982
BxW096	77.1959	108.883	86.5364	237.951	278.657	309.463	30.6062	38.233	73.9144	50.5589	56.0538	62.8309	14.7985	16.4999	17.0192	8.50844	10.2661	13.0201	2.07304	1.86699	1.01745	16.0401	12.8756	12.9021
BxW097	73.918	101.684	92.5551	228.937	252.214	319.311	27.2685	29.7752	56.909	52.5179	59.0779	64.3307	12.5783	11.1296	14.6723	6.86755	5.80315	10.9225	2.07394	1.90777	1.13885	15.7408	11.6025	11.5765
BxW098	75.0204	107.624	99.995	213.899	272.911	331.598	21.4296	37.7032	60.4289	52.497	59.0945	65.2131	11.0387	14.5056	14.0605	5.03972	8.12702	10.3269	2.66251	2.09776	1.12858	15.0895	8.74394	10.3866
BxW099	70.6385	88.3186	79.446	239.737	209.355	340.535	20.8185	17.5677	52.6023	45.7262	56.9287	59.2922	13.2011	13.1602	17.8378	8.46807	8.39054	13.474	1.80336	1.54078	1.09222	16.3397	12.2698	12.0924
BxW101	70.5931	89.81	81.2581	219.327	194.436	286.778	21.5526	17.7502	42.5388	43.3679	60.2275	69.8131	7.97285	10.1019	10.9706	3.03601	5.34907	7.9831	2.58239	1.9422	1.17855	20.7765	12.5836	11.3532
BxW102	73.8032	109.988	92.4216	263.101	287.09	337.319	31.0755	37.5864	62.5928	51.8295	55.4771	62.328	14.0636	16.0012	18.4101	7.78596	10.2092	14.1311	2.29433	1.9808	0.99101	16.2346	12.1088	12.5159
BxW103	76.5417	111.407	100.943	225.6	290.591	313.917	25.9439	43.5579	60.676	51.3066	57.6177	62.7458	12.715	15.8678	15.2925	7.43593	11.4791	10.9885	1.91056	1.49004	1.18531	15.9042	11.0912	13.4557
BxW104	71.9455	97.2791	85.1566	247.058	234.6	314.732	29.5631	29.6723	59.0944	51.8023	57.1132	69.658	10.8445	13.4261	12.8126	6.16521	8.55431	8.57849	2.0284	1.68138	1.37252	16.7576	12.0532	11.3781
BxW105	73.3202	108.979	99.9799	211.407	281.064	336.562	24.0264	31.0206	68.9654	54.448	59.4734	68.9304	12.6265	14.4857	13.3689	5.35654	10.3034	9.18337	2.77589	1.8278	1.27521	14.9976	11.2126	11.6704
BxW108	76.4433	103.955	96.1565	235.453	298.473	332.602	29.7317	50.1677	55.1013	53.9533	58.8984	70.6939	12.336	14.5986	12.9517	7.3222	9.58355	8.94294	1.75989	2.15737	1.28207	15.2406	10.2422	10.7401
BxW110	72.2074	83.6119	79.5483	217.453	196.755	289.715	20.3347	21.4315	47.0144	50.7185	58.4968	65.3301	12.1794	12.6857	17.0879	5.34718	7.69566	13.1824	2.82887	1.84993	1.02775	18.827	12.9159	12.3141
BxW112	76.4145	103.26	97.6002	210.043	278.339	299.339	20.5754	33.4785	68.6552	52.87	63.5459	67.6081	9.26283	11.7079	9.36386	3.50565	6.08997	4.67612	2.67915	2.15247	1.85128	17.2221	9.8168	11.6198
BxW113	73.8716	97.4206	85.5105	248.672	255.226	341.945	24.8581	29.9215	57.1098	55.0099	56.6468	65.5791	12.5112	14.2773	15.4223	6.454	8.51789	11.2502	2.30602	1.92225	1.1486	16.2759	11.8277	12.7653
BxW114	75.1439	104.039	93.975	208.748	256.222	278.001	19.4728	35.3545	39.9818	51.0417	59.3632	64.9724	8.95498	12.2725	13.9429	4.29927	7.73802	9.70873	2.02415	1.63245	1.28069	17.674	11.4592	12.9055
BxW115	75.713	108.164	90.066	206.102	270.905	319.736	20.8863	36.0227	55.6031	52.0761	57.415	68.6926	9.56901	14.0636	13.6847	4.53119	9.2538	9.25278	2.11444	1.96435	1.31965	17.191	11.0286	11.9062
BxW116	77.5655	109.358	109.865	233.443	282.988	317.277	28.8493	41.2804	62.9448	57.9377	62.1518	65.3224	11.0792	12.9939	17.1419	5.71588	7.58137	12.7392	2.14842	1.8171	1.05898	14.5647	10.4352	12.3266
BxW117	70.2615	86.582	84.7234	231.061	235.548	288.412	28.9169	17.0837	59.8971	51.5517	65.4642	66.9138	8.62135	8.44144	14.7836	2.19489	3.39934	10.8427	3.67482	2.80905	1.1144	18.4491	10.59	12.0718
BxW118	75.0576	93.9664	84.9359	263.628	264.891	344.219	26.1679	29.3833	40.0139	51.3266	59.2979	62.961	12.3446	12.7169	15.886	7.22621	8.19104	11.5578	2.04191	2.03553	1.16531	16.2366	11.0579	12.0468
BxW119	70.4715	92.4464	85.1204	241.105	260.733	315.929	25.3903	34.7592	58.6382	51.2228	60.3231	67.5021	11.5395	11.5235	14.4354	5.36411	5.6689	8.96827	2.60903	2.34707	1.50181	17.032	11.0322	12.5185
BxW120	74.6324	108.14	86.0155	239.976	258.39	324.454	21.1512	29.2159	60.0776	48.7973	59.2198	65.0745	13.3149	13.3825	15.9481	8.39304	7.88598	11.8913	1.95032	2.13758	1.0693	16.9235	12.2094	12.8695
BxW121	73.0813	96.4122	83.3641	212.712	282.123	286.271	29.0196	36.415	46.8789	52.5624	59.4264	68.5997	10.2981	13.1852	14.0649	4.65597	8.0256	9.69807	2.28786	2.14349	1.3342	16.7945	12.1959	12.1407
BxW122	74.8119	101.378	85.1244	233.421	261.733	324.721	17.0425	28.1564	59.8491	49.0207	57.9433	65.4274	15.0313	15.262	16.5783	8.45675	9.51969	11.9305	2.15359	2.0407	1.15253	17.6058	11.8481	11.5921
BxW123	76.0598	111.513	102.784	246.454	293.679	335.55	30.5434	40.9348	57.1735	52.9437	59.2603	70.2432	9.15595	12.2005	11.0541	3.50065	5.49825	6.9972	2.95798	2.95347	1.46594	16.707	11.5192	11.405
BxW124	76.816	96.5572	87.4457	235.187	252.15	304.848	23.7285	27.9809	64.7624	53.6075	62.4495	68.6416	12.2247	11.2535	14.7285	5.51526	5.70296	10.1187	2.38249	2.11469	1.27872	14.8737	10.7213	11.1045
BxW125	68.4844	107.453	81.2611	200.915	249.071	308.119	20.4779	20.4761	61.7292	49.7553	60.9707	66.5504	10.0406	12.4554	15.0596	3.9575	7.73386	11.0608	2.15166	2.42582	1.12589	17.6428	10.4055	11.7869
BxW126	76.6728	113.484	102.254	243.701	282.079	321.014	29.3982	43.7308	60.3277	53.6885	62.4413	66.6583	12.1524	15.084	15.2601	6.72043	8.73927	11.1344	2.21469	2.09074	1.12861	14.917	11.989	13.2628
BxW127	72.886	100.5	96.9571	222.383	233.156	290.702	21.84	33.9387	55.9057	54.6607	59.8728	67.5842	10.9778	12.7109	14.8522	5.32482	7.24119	10.5682	2.24361	1.89541	1.24556	15.7013	10.3417	11.5641
BxW128	76.314	102.123	94.6269	224.822	251.093	311.519	24.6698	37.9246	60.4927	48.1571	59.2068	66.3498	9.58601	13.3386	14.086	4.52368	8.83514	9.89116	2.29731	1.73597	1.23738	18.7775	12.3523	13.6129
BxW129	74.4451	112.376	89.7279	228.918	275.982	299.743	26.0866	42.647	46.6102	53.8042	55.1079	65.9036	10.1597	13.0882	12.799	4.63923	7.57424	9.40677	2.24599	2.39131	1.13269	15.9835	10.922	10.5014
BxW131	76.648	97.2585	90.7393	218.381	264.488	337.735	21.3982	37.5658	63.1424	49.4342	53.5638	63.1977	14.7996	16.4763	17.0043	8.97976	10.778	12.7726	1.86154	2.07329	1.05942	14.6162	10.7653	11.7934
BxW132	70.9972	89.5895	82.5105	266.282	277.61	347.421	33.3733	44.5685	72.8811	53.3452	59.4867	68.2522	13.7221	14.6141	14.8196	8.51072	10.2973	10.8428	1.75734	1.77805	1.13648	14.9277	11.0398	10.6902
BxW134	69.0019	91.7142	79.8464	193.412	210.338	275.098	14.0128	10.6343	39.6691	40.6542	58.0864	64.6487	7.06962	10.7881	12.2742	1.99912	5.11894	8.44756	3.09248	2.02316	1.30358	23.8891	14.2896	13.8131
BxW135	73.7568	103.023	97.1772	204.31	241.968	315.522	21.9764	31.4708	54.0883	51.0525	57.0494	68.9792	10.6434	13.3063	15.6873	5.30699	8.77086	11.0965	2.14344	2.06016	1.21599	16.5572	11.7162	13.2463
BxW136	80.9498	115.406	101.652	248.476	284.9	326.288	35.1254	47.8799	73.7636	51.2698	60.3549	64.3418	13.5646	12.4895	14.4782	6.85357	5.97071	7.17911	2.32535	2.35847	1.45294	16.248	11.986	12.8519
BxW137	74.0002	107.901	101.587	238.929	245.149	327.277	25.928	33.6575	56.3032	52.3572	59.3934	67.6099	11.0181	14.0122	16.0073	5.20943	9.64601	10.942	2.00279	1.75444	1.34409	17.5334	10.8354	12.713
BxW138	73.7414	109.537	85.067	271.213	299.267	341.766	36.7472	34.4443	61.0043	56.9522	60.245	70.8411	12.4148	13.1458	12.6754	6.77343	8.41137	8.66395	1.93777	2.19558	1.31294	15.2608	10.3492	11.1963
BxW139	72.9605	99.9352	89.8755	202.013	241.932	297.412	18.3241	26.0615	30.349	47.4299	58.25	65.1637	9.27959	11.6811	10.9666	3.72837	6.70596	6.71946	2.54032	1.94269	1.54577	19.3105	12.3451	12.7335
BxW141	77.4141	108.763	106.107	240.147	288.86	357.49	26.7222	35.0699	61.3529	52.3956	59.3414	69.3814	13.0438	14.6266	12.9406	6.88405	8.06864	8.99641	2.33592	1.9932	1.24169	14.7723	9.99425	10.6371
BxW143	74.7299	102.51	98.6915	214.294	223.639	336.17	16.6268	24.2497	53.4036	49.9544	57.9398	67.3304	11.852	15.4266	15.1889	5.49562	10.2191	10.6403	2.2964	1.51756	1.22893	18.9182	12.8037	12.638
BxW144	73.5273	91.7019	83.9483	220.097	233.85	281.932	24.5791	28.6014	30.8886	46.0082	58.2082	63.7556	11.6502	13.8536	11.5226	5.79546	7.15183	6.57109	2.50578	2.31727	1.68563	18.4697	12.5148	12.8258
BxW145	72.2949	98.139	84.0154	231.358	233.59	324.817	19.935	23.5248	56.0776	47.6899	57.4111	62.8436	14.2164	14.2164	15.4916	8.60903	8.4872	11.4112	2.01284	1.82275	1.11094	16.8959	11.4826	10.6141
BxW146	72.4757	100.38	89.032	227.359	242.839	313.129	19.9182	41.3293	62.947	50.0352	58.8906	64.6925	12.261	14.0141	14.4116	6.2549	8.33707	9.6848	2.52625	2.21045	1.3341	16.8384	10.7624	12.4896
BxW148	60.9385	82.4161	70.051	234.664	246.952	186.701	14.3836	24.811	40.3131	40.3081	58.7002	68.6009	8.33602	13.619	10.6284	2.90556	8.27125	6.51312	2.36056	1.89589	1.56564	24.2673	11.8826	11.6175
BxW149	73.9794	99.3294	89.8754	255.798	269.378	338.616	20.573	35.8953	60.8995	51.2218	54.5966	65.7042	12.166	14.1069	14.3557	6.84222	8.69415	10.2672	1.81381	2.04616	1.23755	15.8116	11.3894	12.257
BxW150	70.5475	100.932	88.6111	231.716	262.849	299.952	13.7553	24.1819	58.8975	51.7127	61.8101	69.5328	11.4945	11.0668	13.1945	5.93415	6.04186	9.45423	2.23546	2.13442	1.19204	15.6957	10.4505	12.1283
BxW151	71.8803	96.8367	86.6079	243.357	269.571	341.189	27.0588	38.9348	55.0675	49.5723	58.5392	68.3117	15.0187	13.3349	15.0612	8.6297	8.34825	10.4602	2.17389	1.64546	1.26595	16.4466	11.3643	11.5747
BxW153	70.3773	112.339	96.3868	202.436	232.568	295.843	16.6611	26.4063	52.6932	49.2564	58.6506	65.4831	9.76667	13.5825	15.5905	4.6736	8.37904	11.1775	2.02568	2.30625	1.1792	18.6685	12.8063	12.4458
BxW155	72.245	93.0953	84.7415	202.491	203.329	267.758	20.0611	25.564	47.9452	48.0402	57.5517	70.5102	9.23723	11.4581	12.8882	4.2431	5.46704	9.23438	2.2735	2.10745	1.21872	18.4231	11.8566	10.3491
BxW157	77.7242	103.127	93.6366	222.356	251.888	320.91	25.14	39.5189	59.5732	49.3182	61.5537	69.5305	14.2726	13.6207	13.3705	7.31211	6.88825	8.67016	2.32598	2.20936	1.42481	15.631	8.92281	9.79687
BxW158	71.8232	90.8504	81.2745	252.062	258.99	327.226	28.4376	31.8018	56.6366	53.456	60.8558	68.8477	14.4113	13.0181	12.8906	7.91561	8.00627	8.90045	2.24527	2.08705	1.27533	14.1925	10.1929	9.77925
BxW159	76.6545	103.353	98.6744	209.706	272.418	311.944	24.01	39.3369	57.7064	49.5819	59.7437	66.8461	10.6377	14.8534	13.788	5.44758	9.44345	9.31726	2.24305	1.86693	1.32432	17.029	10.3575	11.4331
BxW161	75.0257	109.521	96.9661	201.962	238.574	286.627	17.0422	28.8862	51.3016	47.3862	57.7029	61.487	7.55687	15.4671	17.0116	3.74622	10.1149	12.2892	3.15379	1.89044	1.17373	19.3346	11.5905	13.258
BxW162	76.8458	107.014	99.8075	233.363	254.299	331.967	22.4611	40.6211	51.5689	44.5373	56.7648	66.6529	8.71271	14.7868	12.9899	2.48841	8.76003	9.70362	2.82279	1.87343	1.05875	20.9694	10.6879	11.5882
BxW164	74.7817	103.474	89.6511	247.652	274.867	330.884	23.9093	42.72	66.7844	48.3849	57.2498	68.7608	12.5718	13.8119	15.645	5.69758	7.78221	10.6421	2.66237	1.82394	1.27591	17.5791	11.7382	11.0787
BxW165	69.7586	80.7518	85.0414	179.102	180.634	262.383	19.1291	17.6498	37.2746	50.8407	60.2592	69.1844	10.3744	9.83027	13.8548	4.45993	4.91292	10.0558	2.18514	2.28793	1.17423	15.2942	11.8664	10.2132
BxW166	79.0404	109.785	93.407	270.819	281.2	208.472	27.5701	33.9897	22.9927	54.3169	55.2441	63.3135	12.8078	14.5676	15.3099	7.46104	8.42914	10.193	2.02843	1.7016	1.35577	15.1448	12.6738	12.0949
BxW167	72.9264	84.0869	86.4569	200.758	219.423	319.159	26.1755	31.9662	59.9225	56.0984	60.8628	65.0538	15.3734	11.0861	15.2885	9.08423	5.57543	11.0803	1.82246	2.33116	1.14321	12.1076	10.348	12.6169
BxW168	69.6341	98.9875	86.6115	201.493	233.348	272.887	16.5742	23.4171	47.404	53.2806	63.1371	70.199	8.46993	12.6504	9.24439	3.14582	5.8694	4.76148	2.774	2.24873	1.88513	18.0755	9.83929	11.5876
BxW169	69.2377	79.8674	78.4107	197.17	213.834	293.811	21.5875	24.729	63.4265	50.8343	58.0841	68.2065	11.567	13.1557	14.637	6.66664	8.60537	10.7228	1.85632	2.22866	1.13907	16.5243	11.9072	10.8055
BxW170	73.1895	98.2271	87.7928	202.932	251.827	292.147	22.3547	34.1045	37.8915	52.3927	58.9677	69.077	10.5096	11.8813	13.3868	3.73555	7.23527	10.1198	2.76981	1.92408	1.07795	17.2365	11.9051	12.1325
BxW175	72.3214	104.66	76.9964	228.898	261.756	275.98	32.4919	34.6047	30.6884	57.0834	60.4027	67.804	10.3645	13.583	14.3616	4.3839	8.50102	9.2603	2.5787	1.76608	1.40429	14.7463	11.5298	10.9822
BxW176	70.9055	100.82	80.6907	242.558	259.52	306.131	18.1515	25.9111	49.5669	52.2229	58.5463	70.6379	12.9763	14.5272	13.1913	6.19531	8.425	8.80661	2.57808	1.85904	1.40788	16.7974	11.6279	9.99238
BxW177	69.9354	101.805	87.5542	233.537	258.987	314.81	20.0412	32.2132	58.4197	49.5272	57.2391	67.6367	9.69173	14.6329	14.5033	3.54382	8.57034	10.1484	2.89282	2.28889	1.23045	17.2127	11.3992	11.1889
BxW178	74.0824	109.548	86.3923	256.324	279.634	320.334	26.9283	42.1367	54.2716	53.0185	56.1488	68.1225	13.4943	15.2392	13.7618	6.77027	9.46714	8.80428	2.41513	2.29224	1.4369	15.5475	12.6412	11.6869
BxW179	74.3579	97.202	97.2844	269.814	292.199	342.463	31.7982	35.8259	70.8561	52.4223	57.6767	61.4432	12.4835	14.2955	16.7134	7.40148	10.1136	12.653	1.88287	1.73832	1.03384	16.8534	13.3951	13.7017
BxW180	77.3384	111.677	100.799	242.426	272.153	316.351	28.8602	48.2563	58.758	50.6004	56.9497	65.0374	12.9544	15.2056	15.3798	6.63143	9.87335	10.7625	2.23994	2.34641	1.24385	15.6464	11.2478	11.3305
BxW181	77.0907	109.7	108.063	200.287	256.188	296.471	20.4181	30.8221	47.7368	46.7692	58.6866	65.1374	11.5887	12.4053	14.1438	5.71479	7.81722	10.6427	2.24647	1.84589	1.04468	18.4788	11.9565	12.1897
BxW182	76.3972	104.668	102.299	232.818	270.351	319.709	22.5969	38.2699	64.9339	51.4519	58.1396	66.9964	11.9583	14.4537	14.2732	5.16378	7.24759	9.55199	2.68739	1.92067	1.35239	16.0165	11.5842	12.8889
BxW184	70.8795	94.5153	90.3503	211.068	244.181	309.312	25.1947	38.7253	55.1786	53.0521	61.2624	66.1977	10.2127	11.5531	15.2208	4.94657	7.14651	11.0712	2.3288	1.95567	1.15911	17.5254	10.4882	12.5908
BxW185	77.3304	112.711	108.325	201.863	226.871	266.148	14.9566	23.3721	47.5608	44.2826	58.6283	61.8106	9.91085	13.5662	16.4586	3.51643	8.17281	11.4129	2.92211	1.99294	1.25676	18.9116	10.9209	13.4295
BxW186	70.1428	79.3127	75.8074	225.307	200.827	289.523	25.2071	21.7785	35.2096	52.9631	63.6691	71.4946	9.21475	8.92845	11.2936	4.15105	4.15046	7.15992	2.16684	2.08821	1.45291	16.6967	11.0185	10.5415
BxW187	69.6207	81.8202	75.1472	220.464	211.434	305.736	19.779	22.4903	56.7872	48.1969	58.4013	63.0942	14.9762	13.2356	17.9935	7.99091	8.73384	13.7117	2.20203	1.85672	1.06254	18.1129	13.1144	12.5912
BxW193	71.2983	110.091	103.914	243.432	296.577	320.611	21.7515	33.9031	61.6225	53.3113	58.4381	62.1982	12.7778	16.2759	16.2012	6.84792	10.9542	12.2811	2.19506	1.626	1.05727	16.1191	11.3617	13.2463
BxW194	68.8945	82.7247	70.0826	204.245	178.319	266.056	23.4645	17.0558	39.8302	51.7085	59.6228	67.5299	9.97702	11.5079	13.2248	4.81816	8.18696	9.22577	2.10142	1.57114	1.25594	17.4218	11.5478	11.9315
BxW196	74.0655	103.913	92.1947	213.055	218.609	282.59	22.2999	23.962	48.883	51.8322	56.2907	67.8913	9.39412	14.4749	14.1004	4.41761	10.0718	10.1438	2.21008	2.01664	1.17772	19.2916	13.8392	12.367
BxW197	73.0047	93.1778	84.8662	231.88	275.502	319.908	27.8286	34.1546	44.9437	52.6527	62.9438	68.6767	8.65834	9.4864	10.6165	4.11186	4.21053	6.96889	1.9541	2.02002	1.36452	18.4542	11.7715	11.3778
BxW198	72.1295	94.591	85.1787	248.975	246.283	310.487	27.4856	34.8932	65.3814	52.6304	59.9706	68.4906	12.4316	12.0053	14.3431	6.67957	6.00783	10.2349	2.38592	2.46334	1.20286	18.0093	12.6632	12.9669
BxW199	67.8096	85.5381	80.8289	188.095	207.593	268.591	13.0915	17.749	52.0973	46.6008	61.1794	68.8274	7.54445	10.1928	14.7222	2.3903	5.47419	11.0174	2.60558	1.83182	1.09504	20.9965	12.0104	11.4048
BxW200	71.0023	85.4164	84.9254	200.568	220.685	291.988	19.8973	32.4724	58.1939	53.3191	63.1264	72.037	12.6777	10.891	10.9488	6.62455	4.50481	7.05993	2.21281	2.29872	1.46186	14.4777	9.23452	9.58031
BxW201	74.7208	107.322	97.9339	227.69	262.652	304.745	31.2317	39.066	63.4357	54.3803	59.7813	65.2007	9.31348	12.9867	15.0954	3.60871	7.2241	10.6106	2.8491	1.95208	1.22346	16.8092	10.4064	12.0476
BxW202	73.6729	86.3195	86.1248	209.692	260.484	303.167	20.3208	33.0616	33.6753	51.2393	56.4985	65.6463	10.366	14.0138	8.58004	4.60167	9.44786	6.75508	2.72726	1.67173	1.36225	16.9141	12.9964	13.5398
BxW203	69.745	90.546	87.8394	237.031	251.265	305.426	25.6702	30.3692	53.2494	49.5686	60.5447	65.3307	11.0604	12.6171	15.4231	5.40651	8.10578	10.8309	2.05765	2.07089	1.23435	18.2858	11.1595	11.7633
BxW204	72.0435	106.926	96.9805	200.135	305.567	341.211	19.8458	41.9205	59.7277	50.5555	61.2324	69.2014	13.6938	13.2293	12.9573	6.81709	6.80048	8.44512	2.17091	2.02239	1.41918	16.4856	8.40118	9.92136
BxW205	76.6073	102.411	87.3495	219.154	262.02	295.174	24.4181	30.5194	36.2724	50.6663	61.424	70.2498	12.884	12.3888	11.4193	6.83962	7.13704	6.9894	2.13096	1.85923	1.52991	17.0859	12.0575	12.4721
BxW206	74.5604	105.066	103.084	230.396	267.782	329.135	25.9514	38.0316	77.861	52.2699	57.6541	64.6585	13.1169	16.6467	16.1761	6.88936	10.5511	11.7198	2.21425	2.18209	1.11251	15.7703	9.48701	12.0546
BxW207	73.1204	106.405	98.7964	212.655	277.634	313.381	28.0891	36.7468	62.63	60.7124	61.3944	69.7067	11.4321	14.5115	13.7193	5.44725	8.65221	6.62033	2.43052	1.88348	1.47274	12.7319	8.80477	10.3308
BxW208	73.0166	106.201	105.658	228.471	278.004	330.114	28.2263	41.8852	59.5565	53.3847	59.6306	67.13	10.4133	13.3511	13.7977	5.33359	9.12659	9.52214	2.21093	1.69677	1.30321	15.8158	10.0568	10.9615
BxW209	72.9779	97.5114	86.698	205.646	242.868	303.862	10.1792	27.5124	50.4136	50.3717	61.3409	70.6444	7.38822	9.53821	9.60508	2.56818	5.44965	5.84235	2.37308	2.17981	1.58627	18.9036	11.1327	11.9642
BxW210	70.8793	86.1857	80.9621	218.844	232.722	311.699	24.0934	22.5644	53.7538	52.3803	61.2474	69.6171	12.7776	12.0285	14.0428	6.53513	6.96156	9.64191	2.33194	1.9473	1.27202	14.9364	10.5993	10.259
BxW212	78.7504	106.699	96.1796	208.625	248.874	288.959	21.9273	25.0489	47.0084	49.5304	56.3113	64.2241	12.3388	14.4152	16.7388	6.91767	10.1957	12.8575	2.00425	1.78436	1.02338	16.2916	12.1423	12.0362
BxW213	71.75	101.263	97.812	226.606	265.405	307.578	30.5064	37.4394	53.6681	57.6488	58.5107	69.9609	9.34129	14.4805	13.5707	3.29996	8.46336	8.73072	3.12295	2.02919	1.4428	14.0059	11.846	10.5138
BxW214	76.6575	108.824	97.7479	239.541	280.792	326.153	23.6225	40.8232	75.0548	52.833	56.3428	65.0964	14.2875	14.9325	14.3491	8.72138	9.15648	10.4011	1.83918	1.98295	1.13958	14.1311	10.299	11.0518
BxW215	70.4388	90.5117	81.3307	241.307	243.861	300.309	20.0315	30.043	55.3842	53.721	60.5192	70.2282	9.79898	13.2374	11.1171	3.5543	7.68364	6.67914	3.08816	1.91708	1.57768	16.5541	10.101	11.5355
BxW216	71.9097	92.079	83.789	225.28	211.697	285.349	24.6072	21.5599	45.2602	55.9919	61.4813	70.5327	8.98269	11.7647	10.1332	3.25527	6.34198	6.07292	2.71346	2.01721	1.68874	15.5646	10.8475	10.7838
BxW217	71.4272	98.1808	85.4342	247.888	282.413	306.651	30.8881	41.0025	45.5794	53.463	58.4477	65.4806	12.276	14.7391	15.7903	6.15745	8.62913	11.4216	2.39017	1.53148	1.15629	14.9024	11.6329	12.3466
BxW218	69.6892	92.7447	82.6468	234.976	253.381	324.867	27.8529	24.0015	69.1736	54.809	62.4072	67.1417	9.13231	9.94517	13.9719	3.9268	4.18371	9.9039	2.27132	2.39631	1.20916	17.3342	12.2947	12.2342
BxW219	67.8169	80.1487	70.0914	176.717	172.428	242.501	9.45458	9.51173	39.836	45.1721	60.9136	66.5523	11.5171	9.44235	14.3919	5.5368	4.10565	10.1483	2.28782	2.41471	1.19938	19.8547	12.8549	10.8561
BxW220	74.8539	95.3704	88.2609	254.839	280.075	333.257	24.1586	38.8295	61.5913	52.9765	59.0206	67.8089	13.4802	14.7844	14.9974	5.6965	8.90398	10.4274	2.46912	1.99007	1.25959	16.0881	11.7294	11.9126
BxW221	73.9536	108.064	96.9682	226.55	278.374	307.746	25.651	42.6234	51.0651	55.7191	60.7826	67.6525	11.338	15.0632	14.5926	4.76569	7.8811	10.0214	2.29162	2.13138	1.2893	16.6513	11.0321	12.7675
BxW222	71.1252	89.6444	81.0146	224.48	223.898	291.775	33.8688	23.1759	47.082	51.5697	59.253	66.0794	12.9412	13.0416	15.0312	6.94524	7.82891	10.8014	2.39162	1.71909	1.15852	16.3118	10.5636	11.4568
BxW223	71.2697	99.1254	99.6071	247.008	296.171	341.797	27.0885	47.1539	47.7523	51.997	62.0541	69.2019	8.94589	11.3489	11.3803	3.41397	6.63054	6.39152	2.39494	2.0678	1.71769	16.7706	9.82463	11.3514
BxW224	76.7224	100.113	91.2198	258.212	261.167	303.975	30.5919	30.17	46.0997	51.7458	61.4489	67.6345	11.4889	11.9505	12.2659	7.04427	7.51374	8.47132	1.90669	1.5815	1.25371	16.5734	10.8813	11.7293
BxW225	79.2041	105.953	85.0037	249.939	290.689	354.984	32.371	41.5658	65.4309	54.2717	59.0068	68.3286	13.3864	14.198	15.0829	8.393	9.85254	10.9125	1.73362	1.73092	1.18497	13.7555	10.8461	9.98186
BxW226	69.114	85.635	79.9814	215.484	203.186	309.265	11.875	19.8147	40.5337	48.9486	60.4064	61.0184	13.2063	12.6347	17.3113	7.54176	7.54137	12.8049	2.19854	2.08732	1.09797	17.4982	10.707	11.9982
BxW228	67.2007	82.5353	80.9175	208.468	180.459	263.15	19.607	11.0456	24.775	46.9724	60.0559	69.7216	9.72945	13.5229	13.8158	4.62089	7.99559	9.46136	2.13725	1.81199	1.32862	18.4143	11.5935	10.7261
BxW229	74.644	98.1413	89.899	253.939	288.032	341.915	23.9717	39.0824	87.5365	50.8913	61.09	68.1232	14.7143	15.1467	15.7692	9.65532	10.4457	11.5163	1.72694	1.85693	1.15494	16.2394	10.8141	11.3912
BxW230	68.3369	93.0181	87.5948	198.52	228.051	276.527	6.0608	29.4431	51.2765	51.8575	63.6862	69.5439	7.59111	9.37699	13.6035	3.17748	4.77015	9.11889	2.46836	2.22402	1.35206	18.1324	10.3726	11.3248
BxW231	75.0761	92.7269	83.3825	226.261	228.954	302.182	13.755	28.3567	60.4821	50.0288	60.3458	67.7887	12.8061	13.5133	15.8926	7.87829	8.83736	11.8904	1.84584	2.16143	1.09627	15.3125	10.9736	10.9917
BxW235	70.7623	79.6514	98.0478	175.62	173.241	318.615	19.0611	22.7051	57.69	47.1725	55.9413	61.9654	12.003	12.759	17.4345	5.84124	7.96589	13.0877	2.2266	1.49919	1.07053	18.4714	10.7543	12.1507
BxW236	72.0652	109.198	96.8134	228.979	240.837	332.719	22.6211	27.7724	59.8703	49.8613	51.3528	60.1668	14.1341	17.1321	17.1191	8.1968	10.7334	12.9686	2.21316	1.90073	1.06463	16.5614	12.4352	14.2927
BxW237	74.578	108.576	97.2317	244.933	280.751	333.55	27.836	33.2968	73.4096	48.0085	57.8513	64.3571	14.0861	15.4437	16.8402	7.58479	8.77988	11.8976	2.34065	2.23945	1.20075	17.6508	12.2501	13.2594
BxW238	68.9803	85.7604	85.0219	205.885	192	281.509	22.3121	22.3214	32.7599	48.4161	61.4688	67.5857	9.26237	9.80609	14.3762	3.19195	4.62027	8.41162	3.10803	2.43845	1.63464	17.7787	11.4745	11.5408
BxW242	71.8319	80.8426	83.055	217.091	176.037	296.375	20.5003	17.4513	66.8188	52.6763	58.7863	71.4008	12.9542	10.4842	11.1887	7.03173	4.6799	7.84819	2.5529	2.34129	1.2306	16.5033	12.7317	10.5776
BxW243	71.2755	101.85	90.4037	216.922	208.723	279.858	29.789	32.1502	62.2559	48.4425	58.2114	70.4561	12.3317	13.2004	11.8913	6.0486	7.56702	7.83086	2.92242	1.8274	1.40358	16.8811	10.2255	11.1312
BxW244	75.1346	105.644	95.2941	220.475	260.503	330.747	19.3749	34.8139	59.768	49.5422	57.2982	66.6759	11.7025	15.948	15.1084	4.45647	10.0618	10.8826	2.98154	2.1604	1.21424	18.4083	12.2646	12.6201
BxW245	70.9877	106.337	94.6548	232.411	269.201	297.237	26.0724	45.1357	70.3748	49.4943	56.4485	63.1852	13.6439	14.4589	13.6773	8.22438	9.39785	9.26115	2.00338	1.7321	1.32391	17.6621	12.6822	11.5701
BxW246	71.4279	103.165	100.608	197.965	256.484	316.336	18.1883	32.5781	63.5901	50.4774	56.0238	66.45	11.7896	14.6663	15.1495	5.43864	8.84549	11.5105	2.40905	1.70457	1.02278	16.9103	11.3346	11.3063
BxW249	77.7213	105.369	92.4618	259.598	292.304	332.096	36.6368	44.9919	65.6239	53.6579	56.617	65.7155	13.5308	15.0282	15.4429	6.70266	9.3971	11.2214	2.32691	1.85649	1.18022	15.6099	11.1452	11.4685
BxW251	71.9063	108.06	87.3815	238.197	256.566	310.371	30.0346	28.0438	35.81	47.1749	61.1429	68.7792	11.4485	13.3685	11.0518	5.24454	7.36984	6.77089	2.37031	2.45431	1.53378	18.5625	9.84497	10.963
BxW253	75.3223	98.9703	87.6839	256.772	273.377	348.519	42.3937	47.6003	54.5	54.5658	60.3329	69.3119	12.8661	12.8588	14.4138	6.72987	7.66655	10.2771	2.35465	1.7184	1.19291	14.7375	10.6421	10.7563
BxW254	73.0698	104.443	98.0894	215.75	262.914	271.237	26.9983	34.7503	54.049	54.9357	60.4172	69.9267	10.8769	14.0943	12.5661	4.40021	8.39222	8.1581	2.99822	2.20216	1.3821	14.8746	10.5985	11.5939
BxW256	74.7598	105.999	97.9681	249.112	275.637	314.911	31.9262	42.3264	59.4518	52.8554	57.5013	69.7419	13.358	14.1443	15.0365	6.18714	7.89628	10.4097	2.38557	2.00106	1.26762	16.1886	10.9908	10.8144
BxW257	73.7797	107.096	97.9931	228.311	284.495	320.49	19.869	41.5917	62.5092	50.9744	58.0723	66.4687	13.9609	14.8215	14.554	7.80748	8.59707	9.99381	2.08515	2.03511	1.29532	15.5821	11.268	11.5016
BxW258	67.1618	80.9406	93.4615	193.423	204.404	318.925	21.2433	19.2471	62.0988	49.5636	61.6101	64.214	10.6235	10.617	14.9764	4.30622	4.821	10.3619	2.76892	2.59147	1.2953	17.0356	10.9501	11.2088
BxW259	78.652	107.068	106.002	218.778	269.328	317.876	25.3259	36.0885	71.2753	51.89	57.8733	62.717	11.324	13.6406	16.8242	5.1802	8.73373	12.7723	2.64669	1.95156	1.05318	16.881	11.0852	11.9131
BxW260	74.1137	101.057	92.7444	223.503	231.773	317.735	24.911	30.0446	56.1558	48.0889	59.8926	69.81	11.2774	14.2156	15.4082	5.81633	8.4742	11.0738	2.22775	1.83068	1.16898	17.3626	10.9123	11.5505
BxW261	72.0473	94.9865	91.5784	240.439	268.433	331.266	25.8707	36.3725	72.6973	51.806	59.854	68.5474	12.317	13.8898	14.326	6.7194	7.89109	9.35806	2.23976	2.3292	1.35696	15.544	10.143	10.1916
BxW262	77.7263	109.017	97.923	235.219	266.341	327.533	24.0887	37.2181	59.6949	51.1401	61.1234	67.8435	13.4349	13.6721	13.8741	8.30015	9.17445	9.87612	1.60251	1.95902	1.21654	15.1427	10.912	12.0037
BxW263	70.5719	93.9923	84.842	213.548	206.732	283.791	19.9886	25.6962	44.9859	51.1211	57.8141	66.8407	11.631	12.4161	14.6004	4.42995	7.16149	9.69811	2.82948	2.24274	1.32755	17.4797	11.788	12.4906
BxW264	76.9956	93.2068	85.0134	272.152	261.763	351.703	36.6982	30.3939	61.7958	53.881	57.35	63.523	13.1005	13.7135	17.2332	7.60198	8.44899	12.4051	2.11391	1.97704	1.18262	14.998	12.4016	12.7743
BxW265	71.1373	105.927	88.7905	234.723	268.178	334.868	19.2343	36.2863	77.1904	49.6944	61.761	68.019	14.311	13.4325	15.2318	8.06174	7.68608	11.199	2.266	1.86158	1.16673	15.8619	10.1034	11.3261
BxW268	74.3675	98.1575	92.0723	248.494	272.727	310.371	28.5484	41.5624	64.3293	54.243	59.4481	65.0093	10.5228	13.696	16.0754	4.93506	8.93289	11.889	2.46221	1.60753	1.10508	16.2212	11.2313	12.3426
BxW271	76.1033	108.021	100.675	248.8	272.766	324.6	26.455	46.7798	59.7044	53.3894	61.3409	65.8285	13.6689	14.2721	14.1887	7.58684	8.53874	9.81972	2.22605	1.95055	1.28436	14.7925	10.1271	11.5662
BxW274	74.2548	93.8058	105.708	280.383	267.252	325.616	30.0392	27.2446	57.5213	47.0215	58.5772	66.5101	14.8762	14.3459	15.4623	9.03924	9.82979	11.2395	1.96888	1.6333	1.16041	16.1527	10.6515	11.5643
BxW276	72.3227	89.6514	84.6334	293.224	268.44	315.422	32.1908	32.5949	53.1943	47.7265	60.2731	66.3705	14.7267	13.5765	15.9213	7.78625	9.04141	11.1377	2.19566	1.78827	1.24898	16.6363	11.4907	12.2961
BxW277	72.3855	98.3376	97.0461	196.421	210.867	266.416	15.4082	29.2467	55.2677	51.2593	61.3406	67.3821	8.37562	11.6107	12.5232	3.35371	6.85104	8.33143	2.61514	1.70715	1.39519	18.2859	11.4818	12.0579
BxW278	72.3257	96.2936	86.4255	249.699	246.921	311.524	20.9753	31.8747	54.2006	52.0838	59.0467	65.5718	13.4009	12.9443	14.9732	7.45862	8.62012	11.2587	1.84888	1.84125	1.073	16.8215	12.1767	13.3814
BxW280	77.2536	105.35	90.4431	222.375	252.679	302.896	25.0533	38.1785	46.5238	49.2668	61.7481	69.7611	10.8487	12.0837	12.57	5.8227	7.03846	7.77301	1.95425	1.97122	1.50539	17.6176	11.055	11.9153
BxW281	74.9933	110.569	106.127	272.31	316.379	382.02	33.9319	52.0159	81.7763	53.6677	56.7931	67.7424	14.3555	15.4444	15.0369	9.03684	10.491	10.8041	1.82177	1.99543	1.18529	15.3955	11.8378	10.9365
BxW283	75.9293	107.93	98.1877	228.967	279.156	338.318	26.3086	39.8957	60.3096	48.1669	55.9979	61.6703	12.8116	15.7835	16.2914	6.43231	9.96352	11.7329	2.49939	1.88123	1.15993	17.0748	12.0656	12.9191
BxW285	74.2053	115.767	96.5423	259.392	279.097	323.552	29.0469	34.1855	64.8672	50.3394	59.7845	64.975	12.5815	12.9142	15.9788	7.37967	7.60624	12.2211	1.84465	2.16435	1.038	16.936	11.9364	13.2544

## Sheet: SEM_GS
Nome!	FLW-T1	FLW-T2	FLW-T3	HGH-T1	HGH-T2	HGH-T3	FBY-T1	FBY-T2	FBY-T3	JUC-T1	JUC-T2	JUC-T3	BRX-T1	BRX-T2	BRX-T3	SUC-T1	SUC-T2	SUC-T3	RSU-T1	RSU-T2	RSU-T3	FIB-T1	FIB-T2	FIB-T3			T1	T2	T3
224	75.2848	95.9473	82.4044	256.323	285.131	327.52	27.9293	43.8959	71.9846	53.224	60.9374	69.534	15.8454	14.6669	15.3402	10.7263	9.77926	10.8661	1.59593	1.85302	1.21889	14.77	10.9021	10.9473		FLW	0.997511	0.986939	0.999971
225	74.0535	94.268	87.8231	208.081	228.295	305.476	16.7388	37.1079	40.0266	51.5855	62.4865	69.668	8.06645	10.0212	8.96105	2.25075	4.64561	5.23564	2.79406	2.35541	1.62136	16.72	10.0807	11.6777		HGH	0.999983	0.998937	0.99936
BxW-1	73.9808	104.258	97.4345	219.436	230.278	294.898	24.5303	29.947	47.4673	51.0102	58.8802	63.6994	12.81	14.4734	15.6094	6.84988	8.92705	11.0621	2.04005	1.7159	1.20555	16.0994	11.8303	12.4574		FBY	0.831421	0.879357	0.917221
BxW-10	76.0935	88.0118	86.4601	236.323	277.975	335.481	26.1305	46.5079	57.7289	52.5249	62.3751	66.9808	10.323	12.1687	14.6394	4.51027	6.85738	10.334	2.72528	2.11966	1.22384	16.1613	10.2138	12.2767		JUC	0.999796	0.998619	0.999881
BxW-101	70.4063	88.8549	86.3143	219.458	195.576	338.035	25.2709	21.0554	60.5086	43.2976	60.3996	62.7406	7.93672	9.9649	17.5564	2.9999	5.19976	12.7592	2.57584	1.95527	1.12977	20.8707	12.6083	12.8672		BRX	0.999819	0.993626	0.999903
BxW-102	73.9159	107.936	81.2577	263.024	289.512	287.003	29.0132	44.896	42.9224	51.8699	55.8338	69.8197	14.0827	15.6445	10.9763	7.80531	9.8342	7.9874	2.2983	2.00789	1.17884	16.1802	12.1621	11.3615		SUC	0.999791	0.991524	0.999948
BxW-103	76.7056	110.059	92.4155	225.489	292.115	337.385	22.6436	48.5419	63.0254	51.3666	57.88	62.3286	12.7441	15.6367	18.41	7.46545	11.2362	14.1307	1.91639	1.50766	0.990939	15.8221	11.1285	12.5152		RSU	0.999801	0.997878	0.999967
BxW-104	72.0181	96.8018	100.845	247.032	235.223	315.285	29.0302	31.5621	68.2917	51.8141	57.2134	62.8053	10.8498	13.3239	15.3304	6.17133	8.45458	11.0168	2.03016	1.68845	1.18725	16.7422	12.0682	13.4976		FIB	0.998353	0.999574	0.999614
BxW-105	73.6291	110.142	85.1137	211.205	279.957	315.448	18.5447	27.7565	62.7937	54.5538	59.3285	69.6866	12.6782	14.6365	12.8318	5.40876	10.463	8.59251	2.78582	1.81363	1.37345	14.8545	11.1898	11.4
BxW-108	76.6519	105.322	99.9721	235.312	297.145	336.602	25.891	45.7878	69.5869	54.0278	58.6813	68.9355	12.3713	14.7857	13.3715	7.35791	9.78533	9.1851	1.76665	2.14088	1.27529	15.139	10.2062	11.6726
BxW-11	75.3004	103.056	96.2216	244.467	248.46	331.62	23.1962	37.472	49.653	52.3316	57.0128	70.6487	14.6049	15.0011	12.923	9.03421	9.27464	8.92164	1.80805	1.95763	1.28063	15.3538	11.2985	10.707
BxW-110	72.0708	84.0134	97.9988	217.546	196.406	329.721	22.874	20.3447	34.4916	50.6698	58.4434	66.7432	12.1556	12.7286	15.68	5.32278	7.73676	12.0073	2.82425	1.84558	1.00811	18.893	12.9073	11.4974
BxW-111	81.0687	113.677	79.5328	275.808	322.054	289.878	24.1109	21.1391	47.4602	48.3829	61.3242	65.3368	14.7754	12.0788	17.0922	8.34978	7.23089	13.1852	2.37837	1.91158	1.02794	16.4721	10.7068	12.319
BxW-112	76.6544	103.791	97.621	209.876	277.664	299.062	15.8372	31.6046	66.9294	52.9601	63.4735	67.595	9.30669	11.797	9.3567	3.54915	6.18905	4.67096	2.68751	2.14282	1.8509	17.0999	9.80841	11.6114
BxW-113	73.9681	99.4922	85.4775	248.621	252.922	342.499	23.624	22.8727	59.7989	55.0351	56.292	65.6036	12.5228	14.6032	15.4385	6.46589	8.85659	11.2624	2.30829	1.89577	1.14946	16.2426	11.7793	12.7846
BxW-114	75.2362	103.632	93.9607	208.684	256.689	278.15	17.6982	36.8522	41.1647	51.076	59.435	64.9981	8.9731	12.2121	13.947	4.31672	7.66634	9.71171	2.02723	1.63763	1.28088	17.6266	11.4686	12.9214
BxW-115	76.0137	108.817	90.0291	205.893	270.117	320.178	17.6159	33.7744	58.234	52.1876	57.316	68.7143	9.62329	14.1577	13.6967	4.5857	9.35552	9.2615	2.1248	1.95459	1.32021	17.0392	10.9869	11.92
BxW-116	77.6803	109.091	109.841	233.358	283.298	317.737	26.3963	41.9848	64.697	57.9839	62.1572	65.3407	11.104	12.9794	17.1538	5.74009	7.56131	12.7478	2.15239	1.82093	1.05952	14.5019	10.4381	12.342
BxW-117	70.3093	87.5005	84.7238	231.046	234.631	288.465	28.7686	14.2753	59.8235	51.5564	65.3383	66.9126	8.62219	8.55615	14.784	2.19632	3.54528	10.843	3.67515	2.79827	1.11442	18.4431	10.5709	12.0716
BxW-118	74.7214	93.9029	84.9533	263.862	265.124	343.958	32.7431	29.9996	38.6704	51.2002	59.3201	62.9502	12.2823	12.6922	15.8792	7.16393	8.15285	11.5532	2.03	2.03849	1.16502	16.407	11.0589	12.0383
BxW-119	70.3037	91.8999	85.072	241.213	261.24	316.614	28.3445	36.3659	62.7952	51.1665	60.4043	67.5331	11.5123	11.4622	14.4555	5.33623	5.59845	8.98339	2.60361	2.35318	1.50284	17.1097	11.046	12.5398
BxW-12	69.7291	108.682	85.9679	228.134	257.825	325.239	23.595	27.3568	64.306	54.2679	59.1228	65.1074	10.5915	13.4871	15.97	5.80877	7.98114	11.9078	1.90551	2.1299	1.07045	16.9083	12.1972	12.8969
BxW-120	74.5997	96.6981	83.3029	239.993	282.056	287.072	21.6552	36.0274	51.6728	48.7877	59.3995	68.635	13.3107	13.1929	14.0868	8.3881	8.03264	9.71401	1.94919	2.14241	1.33529	16.9344	12.1924	12.1651
BxW-121	73.0344	102.646	85.0644	212.73	260.541	325.711	29.4527	24.3381	64.7851	52.555	57.7863	65.4684	10.2936	15.4141	16.6048	4.65031	9.6975	11.9502	2.28674	2.02628	1.15388	16.8043	11.8195	11.6215
BxW-122	74.6539	110.447	102.776	233.525	294.291	335.66	19.8921	42.9052	58.3141	48.9657	59.3484	70.2449	15.0051	12.1185	11.0543	8.42981	5.40438	6.99721	2.14843	2.96082	1.46591	17.6791	11.5311	11.4036
BxW-123	76.0479	96.6499	87.4049	246.446	251.956	305.402	30.2318	27.2458	67.6051	52.9348	62.4109	68.6649	9.15867	11.2848	14.7414	3.50251	5.74613	10.1282	2.95776	2.11161	1.27938	16.6994	10.7129	11.1175
BxW-124	76.9851	105.186	81.1851	235.081	251.564	309.178	20.9138	28.1784	67.9075	53.6628	61.3569	66.5969	12.2508	12.0944	15.088	5.54206	7.34515	11.0818	2.38748	2.45586	1.12736	14.7987	10.4601	11.8191
BxW-125	68.3857	111.551	102.141	200.982	284.047	322.761	22.3615	49.8215	69.9706	49.7196	62.7645	66.7291	10.0234	14.7897	15.3058	3.93977	8.43403	11.1684	2.14823	2.11497	1.13096	17.6922	12.0308	13.3157
BxW-126	76.6724	97.9992	96.8746	243.688	235.835	291.912	28.8393	42.2208	62.4306	53.6976	60.2998	67.6369	12.1589	12.3506	14.8852	6.72658	6.87019	10.5932	2.2156	1.92525	1.24736	14.9041	10.4031	11.6017
BxW-127	72.9672	101.773	94.5206	222.32	251.487	313.107	19.9681	38.8568	69.5112	54.6984	59.2378	66.4166	10.9967	13.2813	14.1287	5.34305	8.7834	9.92261	2.24668	1.7404	1.2396	15.6543	12.3568	13.6602
BxW-128	76.5334	112.586	89.7404	224.681	275.82	299.498	20.8683	42.0397	45.8343	48.2301	55.0769	65.8936	9.62222	13.1206	12.7925	4.56132	7.60676	9.40174	2.30464	2.39026	1.13239	18.6782	10.9174	10.4926
BxW-129	74.6627	96.3129	90.7046	228.77	265.383	338.326	21.8902	40.2731	66.1529	53.8847	53.6961	63.2221	10.1988	16.3557	17.0205	4.67898	10.6482	12.785	2.25381	2.08416	1.06027	15.8758	10.7852	11.8133
BxW-131	76.7896	89.3725	82.5796	218.277	278.147	346.626	18.3736	46.3278	67.6419	49.4926	59.5827	68.2141	14.8274	14.5309	14.7969	9.00709	10.2093	10.8259	1.86668	1.78427	1.13529	14.537	11.0542	10.6657
BxW-132	71.0572	89.3951	79.8919	266.238	212.801	274.323	32.0705	18.3878	35.7695	53.3699	58.4655	64.6165	13.7334	10.4309	12.2546	8.5219	4.74374	8.43268	1.75959	2.05138	1.30258	14.8951	14.3453	13.7893
BxW-134	68.9337	101.707	97.1402	193.468	243.346	316.075	15.6901	35.532	57.455	40.6223	57.2249	69.0041	7.05392	13.1486	15.7022	1.98382	8.5907	11.1073	3.08774	2.07767	1.21667	23.9316	11.7451	13.2628
BxW-135	73.5868	116.429	101.524	204.418	283.683	328.114	25.071	43.9481	84.6034	50.9942	60.173	64.4228	10.6163	12.6655	14.5293	5.2798	6.15207	7.21669	2.13818	2.34489	1.4561	16.6354	11.9571	12.9088
BxW-136	80.9453	105.001	101.506	248.468	248.441	328.461	34.8313	43.7524	63.0337	51.2758	59.9098	67.6621	13.5676	13.5238	16.0406	6.85586	9.13158	10.9666	2.32554	1.79115	1.34579	16.241	10.9064	12.7518
BxW-137	73.8438	109.777	85.0938	239.043	299.004	341.278	29.2074	33.9173	58.424	52.2933	60.2369	70.8196	10.9877	13.1405	12.6609	5.17928	8.41514	8.65292	1.99749	2.19293	1.31213	17.6187	10.3469	11.1787
BxW-138	73.7623	100.091	89.8117	271.213	241.894	298.181	36.9717	26.1905	35.0046	56.9504	58.2793	65.1994	12.4129	11.6685	10.988	6.77254	6.70481	6.7348	1.9376	1.94089	1.54686	15.2639	12.3462	12.7565
BxW-139	73.0775	106.108	92.239	201.937	246.594	325.936	16.1643	25.382	47.6373	47.4723	61.5048	69.9845	9.29999	12.629	12.8235	3.74846	6.98331	8.98023	2.54416	2.09942	1.21855	19.254	9.91377	10.1973
BxW-14	72.96	109.766	106.192	228.461	288.127	356.233	25.3642	32.7456	54.4928	56.4576	59.2227	69.328	12.377	14.7419	12.906	7.07377	8.18371	8.97101	2.00508	1.98354	1.23995	13.1142	9.97656	10.5987
BxW-141	77.3521	102.054	98.6745	240.191	223.059	336.238	28.0382	22.431	54.8213	52.3691	57.8394	67.3497	13.0309	15.5306	15.192	6.87141	10.3103	10.6422	2.33359	1.51018	1.22904	14.8056	12.7911	12.6415
BxW-143	74.6895	90.3746	83.9735	214.315	235.179	281.797	17.1616	32.7781	29.4108	49.9434	58.4338	63.7444	11.8468	13.6565	11.5168	5.48953	6.94363	6.56662	2.29476	2.333	1.68529	18.9333	12.5464	12.8199
BxW-144	73.6302	98.404	84.0571	220.024	233.085	324.251	22.5935	22.1214	52.7699	46.0469	57.3339	62.8192	11.6691	14.2997	15.4765	5.8132	8.56001	11.4001	2.50917	1.81706	1.11016	18.4176	11.4797	10.5971
BxW-145	72.0012	100.112	88.9928	231.564	243.293	313.804	25.7366	42.6563	66.5871	47.5784	58.9785	64.7186	14.1612	13.9278	14.4296	8.55363	8.25423	9.69841	2.00255	2.21552	1.33508	17.0459	10.7708	12.5103
BxW-146	72.0477	82.2601	70.0364	227.671	247.195	186.963	28.6401	25.5349	41.9776	49.8647	58.7502	68.6101	12.1769	13.5687	10.6352	6.17148	8.23712	6.5183	2.51095	1.89859	1.56605	17.0676	11.8864	11.6265
BxW-148	60.8636	100.279	89.8113	234.72	268.364	339.376	16.0447	33.1164	65.3129	40.2784	54.4649	65.7401	8.32109	14.2211	14.3769	2.89059	8.81056	10.2826	2.35794	2.0356	1.23862	24.3083	11.3726	12.2803
BxW-149	74.0409	103.007	86.4167	255.758	271.733	307.977	19.4907	39.1053	58.3656	51.2429	58.658	68.9897	12.1765	12.8164	12.0779	6.85325	6.44877	8.11837	1.81599	1.98663	1.3235	15.784	10.7347	10.3173
BxW-15	72.8986	100.848	88.6694	248.071	263.247	299.166	32.4415	25.24	54.5235	54.4392	61.8746	69.4983	9.66481	11.022	13.1738	3.22688	5.99309	9.4389	3.04702	2.13716	1.19105	14.9675	10.4597	12.1074
BxW-150	70.3825	97.8974	86.5898	231.812	268.375	341.408	16.2134	35.4882	56.0969	51.6657	58.3653	68.3218	11.4718	13.4983	15.0672	5.91076	8.51916	10.4645	2.23074	1.63236	1.26622	15.7617	11.3376	11.581
BxW-151	71.8752	112.793	96.3471	243.373	232.387	296.527	27.6674	25.7101	56.0522	49.5613	58.6075	65.5112	15.0123	13.6225	15.6093	8.62434	8.43681	11.1917	2.17323	2.3034	1.18023	16.4612	12.8041	12.4672
BxW-153	70.3767	92.4424	84.7875	202.432	204.187	266.95	16.4975	28.1028	44.0146	49.26	57.6689	70.4789	9.76805	11.3469	12.8665	4.67492	5.36813	9.21814	2.02596	2.11674	1.2176	18.6656	11.8781	10.3239
BxW-155	72.1664	103.793	93.6368	202.554	251.099	321.037	21.7935	37.1423	59.4968	48.0067	61.441	69.5344	9.22072	13.7102	13.3738	4.22672	6.98558	8.6727	2.27047	2.19947	1.42497	18.4679	8.90597	9.80239
BxW-157	77.5937	92.3483	81.3615	222.44	257.228	325.916	27.4485	26.5866	49.0686	49.2742	60.6221	68.7908	14.2502	13.2355	12.8532	7.28804	8.23382	8.87225	2.32139	2.06726	1.27335	15.6915	10.1585	9.73685
BxW-158	71.9977	104.543	98.7499	251.954	271.191	310.911	25.6228	35.9892	52.2313	53.5133	59.5888	66.7979	14.4384	14.9927	13.7582	7.94341	9.58868	9.29509	2.25071	1.85393	1.32283	14.1152	10.3427	11.3985
BxW-159	76.945	96.32	86.0234	209.497	252.096	330.305	18.0747	34.291	69.9281	49.6952	57.0916	63.0089	10.6945	14.7299	17.4018	5.50468	10.2035	13.0409	2.25365	1.51063	1.07974	16.8746	10.9288	11.8321
BxW-16	75.9818	107.956	96.9739	248.684	240.321	286.646	24.5296	33.9413	51.3256	47.9954	57.9308	61.4883	13.7581	15.255	17.0133	7.99059	9.87654	12.2907	1.7994	1.91156	1.17387	16.4502	11.626	13.2606
BxW-161	74.6803	105.883	99.8699	202.177	255.591	332.358	22.8937	44.149	47.4562	47.2733	56.9452	66.6211	7.48885	14.6278	12.9713	3.69005	8.5876	9.69014	3.1428	1.88801	1.05785	19.4876	10.7114	11.5686
BxW-162	76.7919	103.038	89.697	233.39	275.146	330.279	23.0795	43.7949	63.026	44.5257	57.3043	68.7351	8.70787	13.7567	15.6298	2.48289	7.7366	10.6309	2.82136	1.82667	1.27514	20.9865	11.7455	11.0633
BxW-164	74.6223	82.1213	85.0649	247.783	179.119	262.882	27.8936	13.1453	27.6786	48.3102	60.0437	69.1709	12.5333	10.0233	13.8474	5.66031	5.1289	10.0503	2.65562	2.27095	1.17383	17.6796	11.837	10.2055
BxW-165	70.354	111.442	93.6553	178.701	279.63	204.654	7.17837	29.1196	2.29373	51.0549	55.021	63.159	10.4874	14.781	15.2124	4.57403	8.64764	10.1205	2.20489	1.68354	1.35074	15.0051	12.6409	11.9842
BxW-166	78.9932	87.3195	86.4205	270.862	216.086	319.836	28.8943	21.8268	63.23	54.2919	60.3707	65.0812	12.7952	11.5383	15.3067	7.4477	6.07924	11.0942	2.02598	2.29279	1.14417	15.1781	10.2765	12.6392
BxW-167	73.9149	96.1623	86.5541	200.092	236.154	273.528	7.60315	32.0905	51.3399	56.4563	63.5659	70.228	15.5485	12.2662	9.26091	9.26113	5.46112	4.77356	1.85604	2.28227	1.88594	11.6276	9.90147	11.6032
BxW-168	69.5835	81.1364	78.4091	201.539	212.704	293.838	18.0192	21.3179	63.4459	53.2524	57.9152	68.2073	8.45651	13.3158	14.638	3.13278	8.77296	10.7237	2.77182	2.21463	1.13914	18.1125	11.8822	10.8059
BxW-169	69.0726	105.836	102.55	197.266	308.218	352.237	24.146	45.5011	49.7903	50.7859	61.0506	68.4236	11.5434	14.885	13.2316	6.64227	8.81094	8.78744	1.85145	1.65288	1.3636	16.5906	10.9629	11.4287
BxW-17	70.92	97.1032	87.7652	264.61	252.795	292.663	33.9838	37.1908	40.3426	55.4767	59.1087	69.0962	11.2491	11.7257	13.3989	4.37946	7.09395	10.1285	2.69371	1.93559	1.0785	16.6164	11.9257	12.1472
BxW-170	73.048	104.058	76.9924	203.025	262.336	275.956	24.8628	36.0647	30.8492	52.344	60.4633	67.8033	10.486	13.5343	14.3612	3.71133	8.44721	9.25997	2.76525	1.77316	1.40422	17.3023	11.5378	10.9815
BxW-175	72.6909	101.932	80.7537	228.66	258.515	305.189	25.974	22.6126	44.2303	57.2101	58.3819	70.5982	10.4266	14.6751	13.1675	4.44664	8.59929	8.78923	2.59067	1.84776	1.40673	14.5757	11.6028	9.96484
BxW-176	70.7359	99.9364	87.5378	242.688	260.983	315.147	21.9107	38.0219	59.9978	52.1488	57.5311	67.6505	12.9395	14.3617	14.5123	6.15928	8.28774	10.1553	2.57182	2.31226	1.23096	16.8952	11.4381	11.2009
BxW-177	69.7233	108.958	86.2755	233.692	280.076	321.879	24.4107	43.633	63.3123	49.4429	56.2133	68.1912	9.65059	15.1786	13.8038	3.5033	9.40014	8.83539	2.88551	2.29738	1.43904	17.3262	12.6498	11.7334
BxW-178	74.0614	96.2321	97.2044	256.331	293.01	343.603	26.8648	38.3363	77.529	53.0185	57.7822	61.4946	13.495	14.1985	16.746	6.77071	10.0017	12.6773	2.41534	1.74914	1.03548	15.5477	13.4146	13.7383
BxW-179	74.0547	110.009	86.2886	270.024	243.239	315.536	37.6407	13.8199	50.5304	52.3071	52.1355	64.0416	12.4261	16.7782	17.1848	7.34316	11.1526	13.8681	1.87178	2.20575	0.894634	17.0087	12.3941	10.9762
BxW-18	76.7693	111.132	100.697	232.941	272.56	317.97	22.1408	48.023	67.3848	51.119	57.0032	65.1059	15.3827	15.1646	15.4237	10.0212	9.81072	10.7951	1.74465	2.35139	1.24614	14.5773	11.2573	11.3812
BxW-180	77.2933	110.202	108.046	242.447	255.991	296.859	29.3071	30.2998	49.4636	50.5899	58.6861	65.1521	12.9489	12.4177	14.1533	6.62527	7.82885	10.6498	2.23894	1.84343	1.04515	15.6592	11.9558	12.2015
BxW-181	77.2301	103.566	102.363	200.191	271.595	318.823	17.9068	42.2591	59.528	46.8207	58.3401	66.9564	11.6129	14.2604	14.2486	5.73911	7.0707	9.53388	2.2512	1.93538	1.35117	18.4104	11.6107	12.8607
BxW-182	76.6318	95.0183	91.4205	232.671	274.77	269.514	18.6037	9.20408	14.7715	51.5281	52.0374	65.7504	11.9962	17.232	12.5375	5.20329	11.9411	8.1345	2.69484	2.13044	1.44983	15.9117	11.6276	9.78512
BxW-184	70.9994	95.3172	90.3967	210.989	243.179	308.591	23.0696	35.6115	51.3149	53.0947	61.0903	66.1676	10.2325	11.7027	15.202	4.96658	7.3153	11.0572	2.33257	1.94418	1.15814	17.4683	10.4696	12.5696
BxW-185	77.3216	115.375	108.205	201.865	223.755	267.94	14.9947	14.1134	57.2467	44.2817	58.1517	61.8858	9.91041	13.9949	16.506	3.51592	8.615	11.4478	2.92164	1.95693	1.25916	18.9137	10.8542	13.4827
BxW-186	70.2809	79.0707	75.8253	225.216	201.291	289.356	22.814	23.3799	33.9237	53.011	63.7714	71.486	9.23759	8.84531	11.2884	4.17386	4.0657	7.15659	2.17124	2.09239	1.45273	16.6321	11.033	10.5373
BxW-187	69.6225	80.7194	75.1514	220.479	212.707	305.758	20.4516	26.3114	56.3198	48.1841	58.6009	63.0926	14.9696	13.0483	17.9946	7.98573	8.54926	13.7132	2.20103	1.87211	1.06271	18.1291	13.1421	12.5917
BxW-19	72.0637	99.9712	86.0911	196.826	237.473	305.973	20.5782	31.0748	59.8557	51.681	55.4345	66.297	13.8521	15.347	15.9966	8.79833	9.95712	11.6215	1.74154	2.02156	1.15053	15.4705	11.6377	11.7108
BxW-193	71.057	110.237	103.926	243.611	296.32	319.984	26.6843	33.1713	57.8593	53.2132	58.3884	62.1723	12.7296	16.3204	16.1848	6.79997	10.9868	12.269	2.18652	1.62307	1.05646	16.25	11.3598	13.229
BxW-194	69.0479	83.7851	70.12	204.163	177.027	265.435	21.4418	12.978	37.0893	51.7485	59.4225	67.5072	9.99534	11.6919	13.211	4.83793	8.37116	9.21553	2.10543	1.55519	1.25522	17.3676	11.5197	11.916
BxW-196	73.9865	85.1862	78.0554	213.117	234.944	309.284	24.0897	38.7944	36.473	51.7975	58.2132	72.4144	9.37671	12.1425	11.0336	4.39958	7.73634	7.64211	2.20663	2.30383	1.33141	19.339	10.8369	9.68721
BxW-197	73.0182	101.262	92.1394	231.866	221.464	283.439	27.4058	32.9432	53.493	52.6622	56.7325	67.9222	8.66372	14.0611	14.1197	4.11773	9.63352	10.1579	1.95501	2.04922	1.17866	18.4427	13.9021	12.3878
BxW-198	71.9932	93.3294	84.8749	249.082	275.093	319.938	30.6301	33.11	44.4056	52.5713	62.8744	68.6864	12.4021	9.52966	10.6174	6.65063	4.25644	6.96986	2.38067	2.01567	1.3646	18.0889	11.7634	11.3796
BxW-199	67.6439	94.4018	85.1331	188.199	246.468	311.233	15.8516	35.2698	69.5806	46.5464	59.9866	68.519	7.51853	11.9882	14.3598	2.364	6.00955	10.2469	2.60077	2.46538	1.20364	21.0693	12.6656	12.986
BxW-2	70.2784	83.8058	80.7882	194.242	209.337	270.256	11.6001	22.9224	55.4084	47.2117	61.4405	68.8476	7.76788	9.96013	14.7337	2.2023	5.23577	11.0259	2.94761	1.85177	1.09562	21.9431	12.045	11.4154
BxW-20	71.853	98.4603	92.1577	223.836	223.589	299.133	17.1188	21.551	51.0086	55.3482	59.8515	67.4941	10.2648	10.5247	14.6007	4.46211	4.74225	9.85065	2.51467	1.91212	1.33126	15.4568	12.8229	12.496
BxW-200	70.9929	102.635	91.7098	200.582	256.011	307.196	20.2788	26.7777	47.491	53.3108	57.4682	67.0458	12.6759	13.4127	12.5028	6.6227	7.52661	7.82617	2.21255	2.06414	1.47942	14.4881	11.4373	13.1626
BxW-201	74.6847	85.2768	85.0423	227.72	221.015	290.293	32.1466	33.2766	48.1969	54.3634	63.1685	71.9639	9.30425	10.8484	10.903	3.59957	4.45566	7.02609	2.84755	2.30285	1.45951	16.8317	9.23968	9.52823
BxW-202	73.6109	106.53	97.8711	209.745	263.52	305.75	21.9162	41.6367	69.0399	51.2099	59.8998	65.242	10.3523	12.8644	15.1223	4.58892	7.09744	10.6304	2.72464	1.9629	1.22478	16.9535	10.4266	12.0777
BxW-203	69.7323	85.7513	86.1548	237.036	261.114	302.625	25.6786	35.2335	30.8107	49.5684	56.6206	65.6255	11.0597	13.9345	8.56294	5.40506	9.36963	6.744	2.0574	1.67765	1.3616	18.2871	13.0162	13.5241
BxW-204	71.9543	90.4167	87.7943	200.199	251.691	306.114	21.6612	31.5078	56.4004	50.5198	60.6137	65.3602	13.6778	12.5557	15.4424	6.80086	8.04705	10.8453	2.16775	2.07627	1.23533	16.5326	11.1677	11.7847
BxW-205	76.7554	107.499	97.0611	219.043	304.641	340.096	21.1758	39.005	53.7906	50.7309	61.0618	69.1495	12.9161	13.3967	12.9248	6.87183	6.96133	8.42105	2.13694	2.01129	1.4175	17.0013	8.38164	9.88408
BxW-206	74.801	101.577	87.278	230.234	262.806	296.267	21.4048	32.8755	42.1264	52.3568	61.5105	70.2972	13.16	12.3014	11.4493	6.93295	7.02125	7.01162	2.22209	1.86893	1.53137	15.6526	12.0701	12.5069
BxW-207	73.6552	103.396	103.136	212.28	269.218	328.302	17.471	42.3749	73.1319	60.9159	57.8589	64.622	11.5335	16.4582	16.1522	5.54829	10.35	11.7021	2.44941	2.19948	1.11125	12.4574	9.5228	12.0254
BxW-208	73.0995	108.575	98.8387	228.419	275.241	312.751	26.7397	29.4816	59.0782	53.4129	61.0537	69.6785	10.4276	14.8665	13.7018	5.34878	9.01889	6.61456	2.21395	1.85543	1.47186	15.7779	8.7588	10.3111
BxW-209	72.9746	105.211	105.741	205.646	278.857	328.75	10.0988	44.4251	52.4888	50.3716	59.767	67.0738	7.38976	13.2447	13.7618	2.5694	9.01442	9.49549	2.37327	1.70749	1.30138	18.9026	10.075	10.9202
BxW-21	76.5858	96.4415	86.7183	215.454	243.914	303.514	24.5745	30.617	48.7365	49.8367	61.4726	70.6299	12.7691	9.4247	9.59538	6.83539	5.29475	5.83501	2.2379	2.1929	1.58576	16.0886	11.154	11.9521
BxW-210	70.9382	106.406	97.622	218.805	236.767	286.371	22.9869	27.5354	53.9538	52.4014	56.6557	60.2729	12.7878	16.3667	16.529	6.54643	11.3164	12.5199	2.33432	1.77655	1.05101	14.9078	11.2617	12.8403
BxW-212	79.0016	85.4404	80.9835	208.461	233.249	311.188	17.4354	24.3596	51.6435	49.6181	61.3196	69.5972	12.3817	11.9747	14.029	6.96093	6.8993	9.63159	2.01204	1.95347	1.27127	16.1742	10.6138	10.2416
BxW-213	72.0108	106.538	96.1125	226.426	249.227	289.921	25.4291	26.0738	52.0787	57.7476	56.345	64.2666	9.38901	14.3887	16.7663	3.34786	10.151	12.8781	3.13226	1.7888	1.02483	13.8733	12.148	12.0674
BxW-214	76.6414	100.915	97.8484	239.538	265.636	307.034	23.4739	38.0438	50.9403	52.8356	58.531	69.9407	14.2885	14.4514	13.5584	8.72098	8.43178	8.72165	1.83891	2.03131	1.44219	14.1272	11.8506	10.5001
BxW-215	70.3311	107.684	97.7794	241.365	282.125	325.733	21.4891	45.0876	72.3299	53.6914	56.5592	65.0769	9.78495	14.725	14.3376	3.539	8.94549	10.393	3.08473	1.99884	1.13906	16.5937	10.3308	11.0393
BxW-216	72.0741	88.7333	81.3133	225.17	245.644	300.553	21.5486	35.188	56.5622	56.0513	60.7516	70.2385	9.0108	13.0399	11.1239	3.28314	7.43753	6.68416	2.71879	1.93835	1.578	15.485	10.1375	11.5427
BxW-217	71.363	93.1517	83.8079	247.933	210.55	285.016	31.9625	17.8856	43.8648	53.439	61.2896	70.556	12.2646	11.9298	10.1453	6.14514	6.51264	6.08137	2.38782	2.00468	1.68929	14.9352	10.8215	10.7972
BxW-218	69.7351	95.941	85.3903	234.944	284.757	307.499	26.7638	47.9679	49.6939	54.8267	58.7802	65.5136	9.14028	14.4419	15.8114	3.93417	8.32917	11.4371	2.27295	1.55882	1.15732	17.3096	11.6831	12.3716
BxW-219	67.7054	94.4156	82.6138	176.802	251.674	325.305	11.9119	18.8377	71.9517	45.1251	62.1312	67.162	11.494	10.2	13.9838	5.51307	4.45642	9.91262	2.28352	2.37655	1.20974	19.9168	12.2589	12.247
BxW-22	76.0593	78.8918	70.0402	251.461	174.095	243.747	32.4114	14.3226	47.0771	52.1632	61.1404	66.6062	13.7622	9.20671	14.4248	8.39559	3.88062	10.1726	2.19746	2.43419	1.20105	13.6323	12.8892	10.8931
BxW-220	74.7009	114.607	96.9053	254.936	271.558	333.166	26.8008	38.5609	68.6483	52.9248	57.8679	67.2706	13.4551	15.9673	14.7887	5.67055	10.1041	10.4509	2.46394	2.16586	1.22451	16.1574	9.67676	11.1287
BxW-221	74.0294	93.8616	88.2575	226.507	281.57	333.374	24.6218	43.5572	61.906	55.7406	59.2559	67.8125	11.3486	14.5652	14.9991	4.77727	8.68365	10.4283	2.29397	2.00751	1.2596	16.6223	11.765	11.9153
BxW-222	71.0752	107.104	96.9621	224.514	279.674	307.81	34.7273	46.2735	51.4639	51.5507	60.9629	67.6553	12.9323	14.8798	14.5937	6.9366	7.68144	10.0222	2.38977	2.14536	1.28936	16.3367	11.0567	12.7665
BxW-223	71.018	93.1858	81.006	247.177	220.298	291.793	31.8309	12.0254	47.2637	51.9063	58.6806	66.0816	8.90087	13.5561	15.032	3.36832	8.36301	10.8019	2.38648	1.67701	1.15851	16.893	10.4811	11.457
BxW-224	76.773	99.0006	99.6595	258.181	296.344	341.125	29.6363	47.8766	43.9439	51.7639	62.1033	69.1721	11.4981	11.3011	11.3632	7.05385	6.58138	6.37897	1.90834	2.07064	1.71684	16.5502	9.82996	11.3338
BxW-225	79.3116	98.462	91.3244	249.85	262.542	302.327	29.7793	34.6063	37.25	54.3216	61.6755	67.5641	13.4108	11.749	12.2206	8.41721	7.30458	8.43778	1.73792	1.59855	1.25138	13.6899	10.9107	11.6771
BxW-226	68.9975	105.403	85.1636	215.567	291.374	352.591	14.2817	43.8203	52.3191	48.9045	59.1576	68.2249	13.184	14.0727	15.0173	7.51931	9.71958	10.8635	2.19421	1.73797	1.18166	17.56	10.8664	9.9071
BxW-228	67.0216	84.8508	80.0186	208.589	204.136	308.733	22.9405	22.818	37.1285	46.9082	60.5757	60.9955	9.6991	12.4784	17.2966	4.59012	7.38918	12.7938	2.13088	2.09779	1.09719	18.5003	10.7328	11.9822
BxW-229	74.6875	82.1357	81.0896	253.915	181.021	259.973	23.4733	12.5046	6.65614	50.9025	60.142	69.5825	14.7197	13.4419	13.7301	9.66177	7.89981	9.39806	1.72832	1.81648	1.32433	16.2222	11.6038	10.6319
BxW-23	76.6466	97.69	89.9421	233.63	288.811	341.303	27.388	41.6543	83.8968	51.5976	61.2369	68.0977	13.0026	15.027	15.7528	6.64191	10.3219	11.504	2.47765	1.86616	1.15408	16.5373	10.8332	11.3728
BxW-230	68.3195	110.944	103.652	198.532	259.339	294.04	6.31124	38.5598	56.4517	51.8518	58.5376	65.6383	7.58789	15.3147	14.6359	3.17386	9.69825	9.91956	2.46766	1.87406	1.32154	18.1405	11.6936	13.0797
BxW-231	74.6872	92.7849	87.4768	226.492	227.903	278.212	19.9401	29.1953	61.2137	49.9078	63.6626	69.6151	12.747	9.41371	13.6472	7.81699	4.78911	9.15129	1.83376	2.22332	1.3543	15.4747	10.3742	11.3738
BxW-235	71.3459	93.2759	83.4258	175.227	228.375	301.527	8.10222	26.1362	56.9426	47.3851	60.2064	67.7595	12.1078	13.6346	15.8755	5.94719	8.94223	11.8776	2.24666	2.15555	1.09543	18.1864	10.9532	10.9712
BxW-236	72.0935	82.4798	98.1002	228.958	169.369	318.055	21.8642	10.6217	54.0653	49.8764	55.3544	61.9372	14.1421	13.3086	17.4178	8.2052	8.55668	13.0755	2.21472	1.45435	1.06969	16.5434	10.6664	12.1325
BxW-237	74.7325	109.637	96.8708	244.823	240.72	331.903	24.7103	27.2947	55.2838	48.068	51.342	60.1318	14.116	17.1394	17.0969	7.61471	10.746	12.9525	2.34624	1.89877	1.06357	17.5696	12.431	14.2681
BxW-238	68.947	108.092	97.2046	205.893	281.542	333.886	22.5162	35.6721	75.7533	48.4078	57.975	64.3732	9.26172	15.3316	16.8499	3.19124	8.65618	11.9047	3.10727	2.2488	1.20121	17.7852	12.2657	13.2699
BxW-24	76.6917	86.4436	85.0669	268.827	191.18	280.898	29.8796	19.6694	29.701	52.7295	61.3228	67.561	15.6298	9.95121	14.361	9.6987	4.76173	8.4005	2.07339	2.42978	1.63386	15.5371	11.4572	11.5236
BxW-242	72.029	110.197	100.887	216.951	295.316	339.387	16.4148	29.6317	42.4795	52.754	55.8634	63.3975	12.993	16.3232	14.6279	7.0696	10.7685	10.1377	2.55991	1.96441	1.2671	16.3999	11.4944	11.7049
BxW-243	71.0902	80.4547	83.0856	217.042	176.324	295.8	32.9072	18.1027	63.8978	48.3784	58.7945	71.3769	12.3004	10.4722	11.173	6.0162	4.65943	7.83688	2.9164	2.34516	1.22987	16.9665	12.7345	10.5588
BxW-244	75.2699	100.333	90.375	220.383	210.457	280.238	16.8659	37.5028	64.4382	49.5919	58.4897	70.4762	11.7261	12.9377	11.903	4.48044	7.30819	7.83926	2.98627	1.84597	1.40411	18.342	10.2649	11.1454
BxW-245	70.9465	105.814	95.33	232.433	260.312	330.333	26.5787	34.1711	57.2512	49.4824	57.2951	66.6566	13.6387	15.9564	15.0968	8.21862	10.0774	10.8741	2.00231	2.15854	1.21366	17.6774	12.2602	12.6077
BxW-246	71.2979	106.487	94.645	198.032	268.963	297.354	19.7842	44.3312	71.0849	50.4447	56.3924	63.2069	11.7745	14.4974	13.6795	5.42226	9.43874	9.26223	2.40566	1.7289	1.32394	16.9539	12.6733	11.5732
BxW-249	77.9684	100.808	100.557	259.426	259.306	317.214	31.786	41.1151	68.0898	53.7511	56.4402	66.4878	13.5777	14.2713	15.1746	6.7501	8.4388	11.5294	2.33543	1.73704	1.02414	15.4838	11.3937	11.3368
BxW-25	69.7396	104.382	92.5152	219.472	293.336	331.17	28.2716	48.1187	60.6386	50.6164	56.7706	65.6769	14.2646	14.8938	15.4178	9.39499	9.23943	11.2027	1.68154	1.86888	1.17901	16.0775	11.1691	11.4387
BxW-251	71.988	107.798	88.2045	238.142	260.054	315.373	28.5078	32.7401	44.2112	47.2067	58.0728	64.5571	11.4635	14.763	17.5195	5.26028	8.07869	13.0156	2.37294	1.95385	1.10114	18.5229	11.3906	12.2502
BxW-253	75.2581	106.718	87.4683	256.819	257.988	309.135	43.7986	32.5109	28.6931	54.54	61.3743	68.7263	12.8525	13.1676	11.0185	6.71648	7.15817	6.74632	2.35224	2.47076	1.53207	14.772	9.87873	10.9269
BxW-254	73.0126	96.325	87.6894	215.805	276.057	348.519	28.5512	55.7117	53.9934	54.9023	60.7043	69.3109	10.86	12.5033	14.4138	4.38429	7.27627	10.2767	2.99584	1.75101	1.19282	14.9183	10.7004	10.757
BxW-256	74.6751	103.781	98.0454	249.178	263.744	271.938	33.8205	37.2757	57.7089	52.8197	60.5604	69.9552	13.3399	13.9786	12.5848	6.16946	8.26447	8.17249	2.3825	2.21145	1.3831	16.2375	10.6165	11.6156
BxW-257	73.6533	105.072	97.9967	228.397	276.797	314.494	22.3965	45.8805	57.2173	50.9267	57.668	69.7239	13.9371	13.9946	15.0248	7.78366	7.71661	10.4009	2.08021	2.01336	1.26699	15.6456	11.0161	10.8011
BxW-258	67.6714	105.751	97.9915	193.095	285.661	320.551	12.3458	45.2158	62.7416	49.737	58.2358	66.4712	10.7076	14.69	14.5566	4.39229	8.44244	9.99588	2.78528	2.05	1.29546	16.8026	11.2962	11.5044
BxW-259	78.3653	84.4028	93.4052	218.964	200.653	319.813	30.5168	7.78771	66.9335	51.7905	61.057	64.251	11.2753	11.1278	15.0002	5.13093	5.36745	10.3795	2.63725	2.54767	1.29654	17.0153	10.8699	11.2364
BxW-26	71.3584	105.031	106.001	233.639	271.414	317.79	20.7249	42.7801	71.0579	55.4498	58.1893	62.7145	13.7762	13.3529	16.8224	7.09181	8.40914	12.7707	2.49238	1.97665	1.05301	14.9012	11.1333	11.9094
BxW-260	73.953	103.829	80.9979	223.613	263.995	310.816	28.0236	21.8817	39.3164	48.0306	61.7497	68.4377	11.2482	13.6769	14.1396	5.78676	7.83897	9.51099	2.22245	1.89952	1.32072	17.4432	10.7055	10.4666
BxW-261	71.9661	100.006	92.7524	240.497	233.042	317.4	27.5366	33.8009	55.0994	51.7741	60.0714	69.7978	12.302	14.0517	15.3993	6.70559	8.29924	11.0669	2.23685	1.84443	1.16845	15.5868	10.9373	11.5378
BxW-262	78.0614	94.3501	91.5721	235.007	269.292	331.418	18.3216	38.9835	73.5373	51.2526	59.9903	68.5544	13.4894	13.7675	14.331	8.35541	7.7627	9.36228	1.61336	2.33934	1.35725	14.9914	10.1616	10.1975
BxW-263	70.2767	107.493	97.9874	213.748	268.256	326.503	25.7343	43.0987	54.4492	51.0124	61.4224	67.8024	11.5774	13.3983	13.8464	4.37663	8.86447	9.85529	2.81923	1.98138	1.21507	17.6262	10.9543	11.9723
BxW-264	76.6269	91.3652	84.7726	272.393	209.482	284.876	43.3435	34.2756	50.9218	53.7522	58.2222	66.888	13.0378	12.0424	14.6317	7.53898	6.75661	9.72188	2.10155	2.27544	1.32919	15.1731	11.8478	12.527
BxW-265	71.0137	93.5259	85.0346	234.812	261.314	351.557	21.8431	29.0481	60.3696	49.6454	57.2915	63.5142	14.2855	13.7654	17.2287	8.03587	8.50851	12.402	2.261	1.97216	1.18245	15.9292	12.3922	12.7706
BxW-268	73.9612	104.905	88.8261	248.766	269.46	334.299	36.1315	40.3104	73.991	54.0968	61.9602	67.9955	10.4503	13.2322	15.2174	4.86112	7.48181	11.1883	2.44845	1.87639	1.16603	16.4195	10.1294	11.31
BxW-27	71.0788	95.2354	91.9967	207.433	276.063	311.477	29.1516	51.9519	70.7959	51.4041	59.9745	65.0588	8.27738	13.1956	16.1071	2.89879	8.41651	11.9124	2.40008	1.64605	1.10671	16.8141	11.3048	12.3793
BxW-271	76	90.7663	85.9316	248.851	240.654	308.087	27.5683	26.8307	43.5394	53.3673	61.8421	71.4653	13.6579	11.4263	11.6946	7.57556	6.30292	7.60767	2.2238	2.03992	1.4361	14.8241	10.3965	10.7098
BxW-274	74.0609	107.624	100.597	280.511	273.424	325.598	33.4884	48.8486	65.7032	46.9469	61.46	65.8752	14.8438	14.1671	14.2172	9.0064	8.44992	9.84089	1.96266	1.95691	1.28585	16.2439	10.1458	11.5989
BxW-276	72.0125	94.8589	105.759	293.423	266.335	324.851	37.5288	24.4524	53.165	47.6233	58.4407	66.4782	14.6767	14.4497	15.4422	7.73525	9.95188	11.2248	2.18585	1.62264	1.15941	16.7751	10.6315	11.543
BxW-277	72.0627	87.0416	84.5828	196.638	271.054	316.032	21.3862	40.8442	56.9366	51.144	60.6835	66.401	8.31883	13.1819	15.9388	3.29653	8.63603	11.1507	2.6045	1.81863	1.24993	18.4429	11.5512	12.3168
BxW-278	71.9339	97.1406	97.0189	249.944	211.876	266.768	27.5133	35.5488	57.315	51.9556	61.4875	67.4018	13.3389	11.4542	12.5354	7.39403	6.68743	8.3402	1.83624	1.71924	1.39577	16.9954	11.4998	12.0728
BxW-28	72.9782	94.8944	86.4015	252.879	248.303	311.864	22.9979	36.2985	55.8779	49.2287	59.2579	65.5856	12.4532	12.7378	14.9826	6.39427	8.39513	11.2659	2.0045	1.85841	1.07352	17.9705	12.2052	13.3913
BxW-280	77.3359	84.4988	85.0042	222.312	238.017	298.981	23.2132	25.6361	40.9476	49.3023	59.2874	67.2844	10.8672	11.2775	12.0699	5.84146	6.57259	7.94031	1.95725	1.97979	1.37012	17.5707	13.2279	13.0803
BxW-281	75.2856	104.483	90.3864	272.106	254.024	303.797	28.2596	42.3722	51.0352	53.7772	61.9638	69.7975	14.4094	11.8857	12.5941	9.09114	6.83393	7.79115	1.83204	1.98689	1.50661	15.2471	11.0869	11.9432
BxW-283	76.0409	109.895	106.143	228.908	316.916	381.729	24.8381	53.4273	80.1457	48.1976	56.8604	67.7297	12.8255	15.4047	15.0288	6.44704	10.4518	10.7984	2.50241	2.00031	1.18495	17.0345	11.8476	10.9263
BxW-284	73.6418	108.575	98.1644	250.032	278.431	338.469	25.5768	37.4919	61.7204	48.9499	55.8543	61.6786	12.7429	15.8927	16.2955	7.51955	10.0797	11.7356	1.92776	1.87457	1.16008	17.7065	12.0445	12.9226
BxW-285	74.0822	93.3221	80.9506	259.443	276.795	343.009	31.0143	27.7718	60.5446	50.3007	57.7217	65.6496	12.5629	14.3342	15.6646	7.36064	9.10463	11.5918	1.84096	2.07473	1.08897	16.9885	11.2664	10.771
BxW-29	75.362	113.398	96.4525	218.766	281.443	324.905	33.014	41.7297	72.5589	48.8209	60.1503	65.0344	9.23962	12.5942	16.0175	3.94165	7.24962	12.2496	2.86204	2.19176	1.04001	20.2043	11.9943	13.298
BxW-3	73.6944	110.858	103.945	225.876	245.589	268.318	25.718	39.1597	77.9742	49.4572	57.4208	63.6867	11.8263	14.3753	14.0085	6.51136	8.99706	9.3378	2.20993	1.95004	1.34851	17.1822	11.4529	12.4874
BxW-30	77.0263	99.4609	85.1402	246.06	242.483	305.064	37.2692	34.0032	63.2665	51.8656	56.2835	68.5299	12.4798	14.6834	12.4902	7.61669	9.9437	8.7502	1.93876	1.77898	1.25572	16.5755	13.3397	11.8414
BxW-31	77.225	101.77	86.1349	231.524	270.684	328.007	29.7285	36.4909	55.3686	53.7011	56.4256	67.9212	11.741	13.7451	14.4874	7.04917	9.55415	10.2634	1.95653	1.8909	1.21732	15.1893	12.4677	11.9867
BxW-32	71.0505	106.03	104.288	207.235	248.617	330.661	21.7033	27.3846	63.1966	52.4624	59.3131	65.345	7.60486	13.781	13.9953	2.28338	7.2956	9.29221	2.56989	1.97483	1.37023	17.4923	10.7414	10.9083
BxW-33	73.1049	104.677	100.398	239.164	245.685	303.569	29.0554	31.9893	57.3781	53.1296	62.7381	66.5722	11.8547	10.2715	13.5551	6.03922	4.53892	7.93503	2.35643	2.40931	1.61658	16.5198	10.296	11.0747
BxW-35	69.7527	104.164	86.5402	198.38	272.628	312.782	4.17072	32.1577	49.8845	47.2266	60.2494	65.3404	9.52102	13.9115	16.7024	4.02628	8.10794	12.0984	2.50774	2.40047	1.14413	18.0089	11.9046	13.7307
BxW-36	73.7577	85.3043	88.6958	224.18	238.668	308.54	23.5792	9.22047	36.8037	52.6235	53.6887	66.7127	14.7468	15.6472	15.56	7.61499	10.8853	10.5198	2.3245	1.64092	1.29788	16.2681	10.3067	10.79
BxW-38	71.9749	108.805	97.9903	242.791	275.095	329.368	24.7636	32.1981	60.0522	51.4139	59.3007	65.9007	12.9776	15.8202	15.3212	6.75432	10.4547	11.1816	2.49331	1.79224	1.15049	16.9146	10.1608	11.8546
BxW-39	69.605	102.929	85.4532	194.084	271.283	337.832	21.4108	25.8328	74.6255	49.3473	56.705	65.6687	9.96887	15.0904	16.5521	3.74553	9.13885	12.2325	2.73659	2.13772	1.11023	19.0534	11.6606	12.2634
BxW-4	67.6781	81.1285	78.4825	216.308	187.952	262.688	22.0721	12.357	40.5001	51.9951	63.7519	66.945	9.03761	11.1045	15.1014	3.32478	5.93743	10.5629	2.51894	2.60423	1.24479	17.1842	12.7809	12.1429
BxW-40	71.0942	91.7707	72.1224	130.103	232.402	267.653		25.6249	40.0786	16.7914	63.7909	71.1204	8.79324	11.9552	12.1005	5.01917	6.6306	8.40998	1.99838	2.15095	1.26434		9.84107	8.92578
BxW-41	74.6257	90.6515	78.5886	186.262	153.344	288.211	13.8593	4.42053	32.3677	45.1152	53.9297	68.628	13.6528	13.1727	14.0486	7.40444	8.02894	9.99771	1.91889	1.66183	1.19138	16.1983	11.6466	10.6829
BxW-42	70.7414	84.5548	79.8524	228.134	211.542	288.395	25.7586	23.6643	47.0178	49.7448	60.4065	68.9452	10.4249	11.6068	11.8316	4.59254	5.56927	7.53432	2.30369	2.09969	1.49359	17.9627	11.8608	12.3965
BxW-43	72.0161	89.7059	83.7998	251.578	260.165	324.163	30.5483	35.9489	56.69	50.3366	55.8116	61.1283	12.1797	13.6129	17.1973	6.48091	8.82124	12.8996	2.11656	1.8487	1.04927	17.0262	11.7361	13.2738
BxW-45	69.5286	91.2098	87.6136	237.631	236.889	308.214	25.7509	27.3456	51.7133	53.2652	60.5879	67.0966	9.12761	13.9919	16.0977	2.60498	8.12265	11.3781	3.30343	2.29799	1.19682	17.2965	11.727	12.6743
BxW-46	76.2831	109.782	98.7376	234.549	272.028	339.342	28.0049	26.8302	58.9482	53.0037	58.9827	69.2695	12.4054	15.4123	14.0785	6.15357	8.86712	9.7105	2.23648	2.17801	1.30854	15.2681	9.62078	10.317
BxW-49	68.2665	91.9659	80.0684	222.195	224.01	306.145	24.6532	25.9539	56.3882	52.0946	60.7043	71.2521	9.43604	12.1848	12.7365	4.18977	7.20658	8.74705	2.3024	2.13816	1.30601	16.8382	11.25	10.8692
BxW-5	78.0242	100.267	106.435	231.355	263.966	328.689	23.8893	26.7523	54.3288	54.2919	57.7931	67.2044	11.2543	13.7545	14.926	4.73323	7.8993	10.4896	2.68561	1.85762	1.26691	16.1063	12.0454	11.014
BxW-50	79.0275	113.481	96.9835	216.422	284.014	342.347	20.0695	30.1029	71.1584	46.9604	53.5659	58.5187	13.0152	17.2887	16.7041	8.36919	11.407	12.663	1.69253	1.66519	1.04154	16.5146	11.7085	12.9959
BxW-51	72.6032	102.712	87.2536	234.45	249.394	295.806	25.3207	20.1834	34.7639	52.1882	62.4144	71.8459	9.51939	9.70846	10.1204	3.54877	3.93262	2.47283	2.56898	2.1631	1.94781	16.9389	10.9232	10.385
BxW-53	69.0091	102.042	93.2412	207.203	230.985	300.913	25.279	37.3584	63.7406	48.7383	62.0869	70.2214	8.0535	11.9802	11.0079	2.62363	6.02305	7.26784	2.85465	2.19759	1.38201	18.9105	10.0133	11.1533
BxW-54	76.0545	109.131	104.038	221.876	272.236	320.132	28.6315	35.4799	66.0002	57.3822	58.671	66.5405	7.31089	13.4228	13.989	2.62872	8.64908	9.78327	2.34245	1.70966	1.24075	14.9515	12.7454	11.0456
BxW-55	75.9587	101.593	106.124	246.691	253.633	322.877	29.7119	29.8783	34.0616	54.0083	59.8377	65.3769	13.2272	13.6912	15.0237	7.31812	7.73555	10.9609	2.13741	1.94057	1.1461	14.2263	10.618	10.0376
BxW-56	73.9294	103.267	88.5363	221.382	260.458	312.964	21.8102	29.5886	47.1217	49.8178	56.0693	64.704	9.74443	13.925	13.9153	4.86318	10.0823	10.0248	2.09419	1.79373	1.20331	17.2601	12.2024	12.8543
BxW-57	76.0684	96.7009	90.0979	227.528	266.49	300.365	22.0165	35.3275	53.5143	55.3974	57.6582	67.8085	11.001	13.9963	14.6583	4.78831	8.9837	10.2112	2.73011	1.65218	1.23914	14.3348	11.5632	10.8499
BxW-58	73.9942	94.7538	91.1674	228.446	249.849	330.345	32.4968	34.5014	68.3451	51.1447	58.402	66.5403	10.1005	14.4752	15.0124	3.75608	8.6793	10.7401	2.78416	2.12587	1.18549	16.7935	10.74	11.8465
BxW-59	67.6037	86.9923	76.9984	203.709	203.109	300.79	13.0868	19.1181	52.1409	46.198	62.5217	68.1381	10.9592	10.2485	14.5581	5.66829	5.66981	10.6324	2.08679	2.06661	1.19405	18.5798	11.7576	10.465
BxW-6	71.9144	97.1897	88.7461	228.223	275.282	299.795	28.9585	36.6642	76.1422	53.8012	59.86	66.9739	11.1364	11.0812	15.0083	5.88007	7.14774	10.0576	1.92982	1.98892	1.35001	15.5562	11.3783	12.3132
BxW-60	71.9612	83.89	78.5781	209.84	199.501	292.292	23.6203	27.1559	49.905	46.3397	63.9432	66.0088	10.3922	8.90803	14.5307	4.74379	4.60738	10.8222	2.33029	2.07965	1.06342	19.162	11.0428	11.5945
BxW-61	78.0296	108.986	101.209	210.327	231.837	301.873	21.5933	30.0098	75.4287	54.3776	57.8497	66.8147	11.6248	13.7159	13.8726	6.65781	8.24481	9.92782	2.06988	1.97578	1.21487	15.848	10.6463	11.3172
BxW-62	76.6199	104.419	96.6586	243.589	267.74	309.504	32.8046	32.7829	67.3576	53.9965	58.6092	66.8172	12.2359	14.3687	14.0248	6.34855	8.63356	9.73991	2.53207	1.67494	1.27194	15.7767	10.5836	11.1632
BxW-63	69.6453	99.3076	86.4032	224.571	251.102	299.446	22.9395	32.186	63.6391	53.4737	63.1457	67.6544	9.78592	12.159	14.736	3.64157	6.1264	10.1326	2.67505	2.13993	1.27411	17.0555	12.1586	12.4802
BxW-65	70.347	102.048	77.4757	182.526	0	229.89	17.1262	0	31.3953	44.7022	0	64.2489	10.7395	0	14.1964	5.37981	0	10.2593	2.30029	0	1.20367	19.2316	0	10.9489
BxW-66	74.7599	112.475	99.0521	210.631	273.294	318.192	31.933	43.2396	57.4682	52.5487	61.2418	65.1155	10.847	13.4315	14.8757	4.92769	8.76972	10.7186	2.41417	1.61812	1.16348	16.9741	11.3024	12.4608
BxW-68	76.6961	108.49	98.0671	209.531	264.512	308.175	19.6544	42.0471	54.902	50.3818	59.901	67.4341	12.2896	13.2258	12.3632	5.99592	6.85801	8.591	2.46605	2.10713	1.242	15.7538	11.2162	11.8364
BxW-69	76.6917	96.8662	83.6705	245.784	278.661	333.905	30.7243	23.8121	65.808	50.3292	58.8729	70.9239	13.4498	14.99	15.3665	8.44215	9.99801	11.4577	1.84078	1.80417	1.09783	15.8452	10.7661	10.6785
BxW-7	74.6282	98.9595	87.8713	252.464	263.554	356.39	23.6938	26.9582	73.6115	51.6869	58.0755	63.827	14.3258	16.0589	16.8446	8.26428	9.94959	13.0304	2.10124	1.85971	0.97358	15.1633	10.1295	11.3459
BxW-70	67.4911	80.7014	77.0758	225.263	203.372	295.317	26.2124	18.9609	54.0764	51.9978	61.7682	67.286	7.48448	9.88894	14.1616	2.43979	4.98094	9.98565	2.63683	2.12822	1.22636	17.6618	11.6423	11.9505
BxW-71	69.5891	87.9285	79.6104	220.542	216.655	291.211	19.3503	25.6408	40.9276	49.5836	61.3094	68.6042	9.23867	12.0172	14.683	3.12755	5.66898	9.7594	3.11535	2.35343	1.35131	19.6034	11.9133	11.4585
BxW-72	70.3995	85.5744	82.2074	229.174	216.298	300.421	27.2836	16.6912	61.5483	48.5888	59.4291	63.1313	12.3291	10.8906	15.8413	6.66433	6.77476	11.9582	1.9046	1.48848	1.06288	17.1892	11.5553	11.7834
BxW-73	75.2501	99.8738	88.9735	184.227	211.86	286.737	15.5624	33.3398	72.7598	47.2233	59.043	62.655	9.90394	13.2069	17.5704	4.23267	8.21417	13.5347	2.33908	2.07478	0.975509	19.284	11.9928	12.7331
BxW-74	79.9607	106.04	95.9874	235.369	291.272	315.668	29.5002	51.4753	49.5876	52.1015	59.1412	70.2609	12.8572	14.8667	12.316	6.84524	9.34459	8.55637	2.16092	1.85745	1.27959	14.0333	10.1406	10.6399
BxW-75	69.6509	82.1255	81.0682	224.84	204.299	285.514	26.0617	19.4582	37.7208	50.5601	59.4311	71.0099	10.5361	10.6168	9.81612	4.55296	5.61337	5.72893	2.27606	1.94683	1.62948	17.5857	11.3712	11.0334
BxW-76	71.1026	92.8	89.3897	248.695	259.465	285.066	32.2535	38.156	64.4931	53.9606	62.5234	68.9457	11.9683	12.753	13.7565	5.14476	6.27193	9.64622	2.78293	2.11902	1.2596	15.8782	10.5436	12.3834
BxW-77	75.3483	108.043	100.473	237.879	293.763	321.971	33.5337	41.8866	68.1598	54.3148	59.5679	65.9016	10.9528	12.9769	14.6955	4.7631	7.29743	10.1116	2.9023	1.89779	1.30511	15.105	10.1926	11.704
BxW-79	74.8031	104.193	101.97	273.078	287.649	328.399	27.6024	37.8369	65.4018	60.3417	60.889	69.3433	10.6432	12.897	12.7158	3.76006	6.75442	8.42654	3.05775	2.44008	1.36417	13.8288	12.1428	10.6728
BxW-80	79.9205	96.5495	89.6996	151.773	213.943	321.656		9.91838	58.0331	40.6864	56.9495	70.2427	13.785	14.0459	14.5879	7.52345	8.84759	9.60637	1.98436	1.79794	1.3732	18.3071	12.2061	10.7843
BxW-81	75.3875	111.157	105.656	221.571	247.85	327.994	30.083	30.3583	70.4379	50.3742	57.0622	62.293	13.6512	16.4458	15.7839	6.56985	11.044	11.0737	2.4135	2.17878	1.22837	15.6686	11.5384	12.5814
BxW-82	75.9	108.5	95.9173	250.024	294.133	330.196	27.3202	18.1734	73.3244	50.6901	61.0325	60.804	11.9661	12.5224	16.1995	5.95627	7.06945	11.8266	2.22961	1.96013	1.18487	17.1773	10.9083	12.9648
BxW-83	79.9382	108.037	87.6948	263.476	301.439	333.907	31.5363	43.1469	72.6765	47.0832	57.4868	61.81	17.0282	15.3944	17.7113	11.5679	10.6739	13.5937	1.5532	1.85231	1.01099	16.2174	11.8152	11.8792
BxW-84	72.0158	104.277	103.799	200.692	239.069	307.901	19.8096	32.854	73.6194	51.9132	60.316	65.6453	8.66745	13.5105	15.1344	3.12619	8.08686	10.8936	2.82973	2.12495	1.15659	17.6773	10.9704	11.3643
BxW-85	73.5846	98.4127	89.5926	224.202	271.558	327.646	25.9344	40.659	70.0182	49.0692	53.7539	67.4093	14.4544	17.0161	17.718	8.64624	11.2621	13.0253	2.15766	1.7162	1.1035	16.6737	10.4533	11.6278
BxW-86	71.9749	101.509	102.018	183.054	196.947	202.648	10.299	18.0142	9.75542	52.0617	56.5279	70.6458	11.1646	14.9943	11.8662	5.66988	8.03104	7.26037	2.21737	2.4488	1.52999	15.8887	10.5442	10.2174
BxW-87	75.3035	106.479	84.9521	222.106	237.01	288.524	20.398	10.9966	28.6585	47.3674	56.8692	68.8019	12.8772	14.0947	11.855	6.6367	8.28481	7.49539	2.12397	2.37598	1.47294	17.7451	11.6548	10.7661
BxW-89	69.6364	89.5791	82.4457	215.27	217.936	268.117	29.7359	11.4944	21.1176	55.348	59.2234	68.9494	9.71397	12.1759	12.5825	4.01362	6.68172	8.57118	2.2574	2.36173	1.28325	14.383	12.1814	10.3436
BxW-9	77.2965	105.576	106.19	262.862	272.062	326.336	32.6557	16.6609	41.9446	52.6323	59.1558	67.3965	11.4481	15.0917	15.2857	6.28851	10.4754	11.3611	2.24391	1.60996	1.1	14.9562	9.78766	10.8951
BxW-90	75.3719	98.283	87.5366	300.713	299.45	357.757	57.6682	40.8852	58.8253	51.5453	56.7945	64.0477	15.3397	14.0946	16.5943	10.1732	8.965	12.9778	1.68826	1.95989	0.909443	14.6261	11.5475	12.2117
BxW-91	73.6716	86.3624	82.2159	254.035	227.87	320.287	28.9517	31.3721	63.7766	52.9274	62.6146	64.0415	13.7513	10.4161	16.3963	8.34531	4.28024	12.1757	1.99887	2.74993	1.09512	14.7505	10.8154	12.0303
BxW-93	76.5723	94.246	85.0568	256.404	239.866	311.391	34.5856	38.583	65.4802	55.8801	59.6213	69.8556	12.4094	13.4703	13.7098	4.88813	8.5214	9.55714	2.69865	2.02605	1.30354	14.0351	11.32	10.4523
BxW-96	77.267	109.773	86.5077	237.897	277.662	309.945	29.1227	35.0329	76.5694	50.5883	55.8943	62.8499	14.8128	16.6341	17.0323	8.52252	10.4083	13.0297	2.07559	1.85615	1.01808	16.0007	12.8519	12.9162
BxW-97	73.9681	101.069	92.5416	228.908	252.866	319.44	26.5935	31.4713	57.7996	52.5325	59.147	64.3343	12.5862	11.0507	14.6743	6.87619	5.72392	10.9237	2.0757	1.91469	1.13892	15.7215	11.6124	11.578
BxW-98	75.2455	106.121	99.9494	213.759	274.483	332.587	17.7081	42.8442	66.9518	52.57	59.3345	65.2604	11.0736	14.2912	14.0874	5.07587	7.88616	10.3465	2.6696	2.11611	1.1299	14.9917	8.78152	10.4157
BxW-99	70.4178	88.2924	79.441	239.872	209.21	340.364	24.4713	17.4227	52.5355	45.6551	56.9381	59.2867	13.1674	13.1582	17.8335	8.43308	8.38005	13.4702	1.79644	1.53921	1.09198	16.435	12.2685	12.0854
	0.997511	0.986939	0.999971	0.999983	0.998937	0.99936	0.831421	0.879357	0.917221	0.999796	0.998619	0.999881	0.999819	0.993626	0.999903	0.999791	0.991524	0.999948	0.999801	0.997878	0.999967	0.998353	0.999574	0.999614

## Sheet: COM_GS
Nome!	FLW-T1	FLW-T2	FLW-T3	HGH-T1	HGH-T2	HGH-T3	FBY-T1	FBY-T2	FBY-T3	JUC-T1	JUC-T2	JUC-T3	BRX-T1	BRX-T2	BRX-T3	SUC-T1	SUC-T2	SUC-T3	RSU-T1	RSU-T2	RSU-T3	FIB-T1	FIB-T2	FIB-T3
224	75.1821	95.9756	82.4015	256.386	285.236	327.524	29.6877	44.1324	72.4045	53.1897	60.976	69.5359	15.8294	14.6297	15.34	10.7091	9.76581	10.8654	1.59246	1.85307	1.21878	14.8156	10.9044	10.9477
225	73.9974	96.3527	87.8207	208.136	226.01	305.479	18.4493	30.028	39.9718	51.5517	62.1388	69.6662	8.04966	10.3482	8.95984	2.23516	4.99686	5.2347	2.79145	2.32893	1.62129	16.7627	10.0287	11.6767
BxW-1	73.9805	105.097	97.5549	219.436	229.649	293.119	24.5496	27.6786	37.6728	51.0091	58.775	63.6228	12.8108	14.5628	15.5618	6.85021	9.03732	11.0269	2.03987	1.70854	1.20312	16.101	11.8107	12.4031
BxW-10	76.3236	90.2813	86.4625	236.158	275.864	335.464	21.475	39.7927	57.4388	52.6149	62.054	66.9956	10.3676	12.4785	14.6381	4.55547	7.18109	10.3331	2.73359	2.09459	1.22382	16.0403	10.162	12.2753
BxW-101	70.5931	89.81	86.289	219.327	194.436	338.422	21.5526	17.7502	62.3598	43.3679	60.2275	62.7559	7.97285	10.1019	17.5661	3.03601	5.34907	12.7663	2.58239	1.9422	1.13027	20.7765	12.5836	12.8787
BxW-102	73.8032	109.988	81.2581	263.101	287.09	286.778	31.0755	37.5864	42.5388	51.8295	55.4771	69.8131	14.0636	16.0012	10.9706	7.78596	10.2092	7.9831	2.29433	1.9808	1.17855	16.2346	12.1088	11.3532
BxW-103	76.5417	111.407	92.4216	225.6	290.591	337.319	25.9439	43.5579	62.5928	51.3066	57.6177	62.328	12.715	15.8678	18.4101	7.43593	11.4791	14.1311	1.91056	1.49004	0.99101	15.9042	11.0912	12.5159
BxW-104	71.9455	97.2791	100.943	247.058	234.6	313.917	29.5631	29.6723	60.676	51.8023	57.1132	62.7458	10.8445	13.4261	15.2925	6.16521	8.55431	10.9885	2.0284	1.68138	1.18531	16.7576	12.0532	13.4557
BxW-105	73.3202	108.979	85.1566	211.407	281.064	314.732	24.0264	31.0206	59.0944	54.448	59.4734	69.658	12.6265	14.4857	12.8126	5.35654	10.3034	8.57849	2.77589	1.8278	1.37252	14.9976	11.2126	11.3781
BxW-108	76.4433	103.955	99.9799	235.453	298.473	336.562	29.7317	50.1677	68.9654	53.9533	58.8984	68.9304	12.336	14.5986	13.3689	7.3222	9.58355	9.18337	1.75989	2.15737	1.27521	15.2406	10.2422	11.6704
BxW-11	75.3881	102.473	96.1565	244.417	249.176	332.602	21.8049	39.6455	55.1013	52.3599	57.1161	70.6939	14.6197	14.8979	12.9517	9.05008	9.16627	8.94294	1.81098	1.96591	1.28207	15.3169	11.3131	10.7401
BxW-110	72.2074	83.6119	97.9112	217.453	196.755	330.94	20.3347	21.4315	41.614	50.7185	58.4968	66.7967	12.1794	12.6857	15.7135	5.34718	7.69566	12.0319	2.82887	1.84993	1.0098	18.827	12.9159	11.5335
BxW-111	80.9946	110.432	79.5483	275.846	325.52	289.715	25.0632	31.8669	47.0144	48.3662	61.8367	65.3301	14.7673	11.6024	17.0879	8.341	6.72202	13.1824	2.37644	1.95077	1.02775	16.4987	10.7844	12.3141
BxW-112	76.4145	103.26	97.6002	210.043	278.339	299.339	20.5754	33.4785	68.6552	52.87	63.5459	67.6081	9.26283	11.7079	9.36386	3.50565	6.08997	4.67612	2.67915	2.15247	1.85128	17.2221	9.8168	11.6198
BxW-113	73.8716	97.4206	85.5105	248.672	255.226	341.945	24.8581	29.9215	57.1098	55.0099	56.6468	65.5791	12.5112	14.2773	15.4223	6.454	8.51789	11.2502	2.30602	1.92225	1.1486	16.2759	11.8277	12.7653
BxW-114	75.1439	104.039	93.975	208.748	256.222	278.001	19.4728	35.3545	39.9818	51.0417	59.3632	64.9724	8.95498	12.2725	13.9429	4.29927	7.73802	9.70873	2.02415	1.63245	1.28069	17.674	11.4592	12.9055
BxW-115	75.713	108.164	90.066	206.102	270.905	319.736	20.8863	36.0227	55.6031	52.0761	57.415	68.6926	9.56901	14.0636	13.6847	4.53119	9.2538	9.25278	2.11444	1.96435	1.31965	17.191	11.0286	11.9062
BxW-116	77.5655	109.358	109.865	233.443	282.988	317.277	28.8493	41.2804	62.9448	57.9377	62.1518	65.3224	11.0792	12.9939	17.1419	5.71588	7.58137	12.7392	2.14842	1.8171	1.05898	14.5647	10.4352	12.3266
BxW-117	70.2615	86.582	84.7234	231.061	235.548	288.412	28.9169	17.0837	59.8971	51.5517	65.4642	66.9138	8.62135	8.44144	14.7836	2.19489	3.39934	10.8427	3.67482	2.80905	1.1144	18.4491	10.59	12.0718
BxW-118	75.0576	93.9664	84.9359	263.628	264.891	344.219	26.1679	29.3833	40.0139	51.3266	59.2979	62.961	12.3446	12.7169	15.886	7.22621	8.19104	11.5578	2.04191	2.03553	1.16531	16.2366	11.0579	12.0468
BxW-119	70.4715	92.4464	85.1204	241.105	260.733	315.929	25.3903	34.7592	58.6382	51.2228	60.3231	67.5021	11.5395	11.5235	14.4354	5.36411	5.6689	8.96827	2.60903	2.34707	1.50181	17.032	11.0322	12.5185
BxW-12	69.6672	108.14	86.0155	228.163	258.39	324.454	24.2454	29.2159	60.0776	54.2551	59.2198	65.0745	10.5865	13.3825	15.9481	5.80308	7.88598	11.8913	1.90397	2.13758	1.0693	16.9257	12.2094	12.8695
BxW-120	74.6324	96.4122	83.3641	239.976	282.123	286.271	21.1512	36.415	46.8789	48.7973	59.4264	68.5997	13.3149	13.1852	14.0649	8.39304	8.0256	9.69807	1.95032	2.14349	1.3342	16.9235	12.1959	12.1407
BxW-121	73.0813	101.378	85.1244	212.712	261.733	324.721	29.0196	28.1564	59.8491	52.5624	57.9433	65.4274	10.2981	15.262	16.5783	4.65597	9.51969	11.9305	2.28786	2.0407	1.15253	16.7945	11.8481	11.5921
BxW-122	74.8119	111.513	102.784	233.421	293.679	335.55	17.0425	40.9348	57.1735	49.0207	59.2603	70.2432	15.0313	12.2005	11.0541	8.45675	5.49825	6.9972	2.15359	2.95347	1.46594	17.6058	11.5192	11.405
BxW-123	76.0598	96.5572	87.4457	246.454	252.15	304.848	30.5434	27.9809	64.7624	52.9437	62.4495	68.6416	9.15595	11.2535	14.7285	3.50065	5.70296	10.1187	2.95798	2.11469	1.27872	16.707	10.7213	11.1045
BxW-124	76.816	107.453	81.2611	235.187	249.071	308.119	23.7285	20.4761	61.7292	53.6075	60.9707	66.5504	12.2247	12.4554	15.0596	5.51526	7.73386	11.0608	2.38249	2.42582	1.12589	14.8737	10.4055	11.7869
BxW-125	68.4844	113.484	102.254	200.915	282.079	321.014	20.4779	43.7308	60.3277	49.7553	62.4413	66.6583	10.0406	15.084	15.2601	3.9575	8.73927	11.1344	2.15166	2.09074	1.12861	17.6428	11.989	13.2628
BxW-126	76.6728	100.5	96.9571	243.701	233.156	290.702	29.3982	33.9387	55.9057	53.6885	59.8728	67.5842	12.1524	12.7109	14.8522	6.72043	7.24119	10.5682	2.21469	1.89541	1.24556	14.917	10.3417	11.5641
BxW-127	72.886	102.123	94.6269	222.383	251.093	311.519	21.84	37.9246	60.4927	54.6607	59.2068	66.3498	10.9778	13.3386	14.086	5.32482	8.83514	9.89116	2.24361	1.73597	1.23738	15.7013	12.3523	13.6129
BxW-128	76.314	112.376	89.7279	224.822	275.982	299.743	24.6698	42.647	46.6102	48.1571	55.1079	65.9036	9.58601	13.0882	12.799	4.52368	7.57424	9.40677	2.29731	2.39131	1.13269	18.7775	10.922	10.5014
BxW-129	74.4451	97.2585	90.7393	228.918	264.488	337.735	26.0866	37.5658	63.1424	53.8042	53.5638	63.1977	10.1597	16.4763	17.0043	4.63923	10.778	12.7726	2.24599	2.07329	1.05942	15.9835	10.7653	11.7934
BxW-131	76.648	89.5895	82.5105	218.381	277.61	347.421	21.3982	44.5685	72.8811	49.4342	59.4867	68.2522	14.7996	14.6141	14.8196	8.97976	10.2973	10.8428	1.86154	1.77805	1.13648	14.6162	11.0398	10.6902
BxW-132	70.9972	91.7142	79.8464	266.282	210.338	275.098	33.3733	10.6343	39.6691	53.3452	58.0864	64.6487	13.7221	10.7881	12.2742	8.51072	5.11894	8.44756	1.75734	2.02316	1.30358	14.9277	14.2896	13.8131
BxW-134	69.0019	103.023	97.1772	193.412	241.968	315.522	14.0128	31.4708	54.0883	40.6542	57.0494	68.9792	7.06962	13.3063	15.6873	1.99912	8.77086	11.0965	3.09248	2.06016	1.21599	23.8891	11.7162	13.2463
BxW-135	73.7568	115.406	101.652	204.31	284.9	326.288	21.9764	47.8799	73.7636	51.0525	60.3549	64.3418	10.6434	12.4895	14.4782	5.30699	5.97071	7.17911	2.14344	2.35847	1.45294	16.5572	11.986	12.8519
BxW-136	80.9498	107.901	101.587	248.476	245.149	327.277	35.1254	33.6575	56.3032	51.2698	59.3934	67.6099	13.5646	14.0122	16.0073	6.85357	9.64601	10.942	2.32535	1.75444	1.34409	16.248	10.8354	12.713
BxW-137	74.0002	109.537	85.067	238.929	299.267	341.766	25.928	34.4443	61.0043	52.3572	60.245	70.8411	11.0181	13.1458	12.6754	5.20943	8.41137	8.66395	2.00279	2.19558	1.31294	17.5334	10.3492	11.1963
BxW-138	73.7414	99.9352	89.8755	271.213	241.932	297.412	36.7472	26.0615	30.349	56.9522	58.25	65.1637	12.4148	11.6811	10.9666	6.77343	6.70596	6.71946	1.93777	1.94269	1.54577	15.2608	12.3451	12.7335
BxW-139	72.9605	104.312	92.1616	202.013	248.534	326.954	18.3241	31.2988	53.6121	47.4299	61.7741	70.0343	9.27959	12.3674	12.8535	3.72837	6.6786	9.00171	2.54032	2.12131	1.21999	19.3105	9.95836	10.2317
BxW-14	72.74	108.763	106.107	228.614	288.86	357.49	29.6525	35.0699	61.3529	56.3742	59.3414	69.3814	12.3372	14.6266	12.9406	7.03417	8.06864	8.99641	1.99728	1.9932	1.24169	13.2265	9.99425	10.6371
BxW-141	77.4141	102.51	98.6915	240.147	223.639	336.17	26.7222	24.2497	53.4036	52.3956	57.9398	67.3304	13.0438	15.4266	15.1889	6.88405	10.2191	10.6403	2.33592	1.51756	1.22893	14.7723	12.8037	12.638
BxW-143	74.7299	91.7019	83.9483	214.294	233.85	281.932	16.6268	28.6014	30.8886	49.9544	58.2082	63.7556	11.852	13.8536	11.5226	5.49562	7.15183	6.57109	2.2964	2.31727	1.68563	18.9182	12.5148	12.8258
BxW-144	73.5273	98.139	84.0154	220.097	233.59	324.817	24.5791	23.5248	56.0776	46.0082	57.4111	62.8436	11.6502	14.2164	15.4916	5.79546	8.4872	11.4112	2.50578	1.82275	1.11094	18.4697	11.4826	10.6141
BxW-145	72.2949	100.38	89.032	231.358	242.839	313.129	19.935	41.3293	62.947	47.6899	58.8906	64.6925	14.2164	14.0141	14.4116	8.60903	8.33707	9.6848	2.01284	2.21045	1.3341	16.8959	10.7624	12.4896
BxW-146	72.4757	82.4161	70.051	227.359	246.952	186.701	19.9182	24.811	40.3131	50.0352	58.7002	68.6009	12.261	13.619	10.6284	6.2549	8.27125	6.51312	2.52625	1.89589	1.56564	16.8384	11.8826	11.6175
BxW-148	60.9385	99.3294	89.8754	234.664	269.378	338.616	14.3836	35.8953	60.8995	40.3081	54.5966	65.7042	8.33602	14.1069	14.3557	2.90556	8.69415	10.2672	2.36056	2.04616	1.23755	24.2673	11.3894	12.257
BxW-149	73.9794	104.762	86.4458	255.798	269.654	307.528	20.573	32.9667	55.2974	51.2218	58.3519	68.9653	12.166	13.1053	12.0625	6.84222	6.75461	8.10704	1.81381	1.96336	1.32274	15.8116	10.6916	10.3001
BxW-15	73.0075	100.932	88.6111	247.997	262.849	299.952	30.4114	24.1819	58.8975	54.4802	61.8101	69.5328	9.68519	11.0668	13.1945	3.24736	6.04186	9.45423	3.05053	2.13442	1.19204	14.9142	10.4505	12.1283
BxW-150	70.5475	96.8367	86.6079	231.716	269.571	341.189	13.7553	38.9348	55.0675	51.7127	58.5392	68.3117	11.4945	13.3349	15.0612	5.93415	8.34825	10.4602	2.23546	1.64546	1.26595	15.6957	11.3643	11.5747
BxW-151	71.8803	112.339	96.3868	243.357	232.568	295.843	27.0588	26.4063	52.6932	49.5723	58.6506	65.4831	15.0187	13.5825	15.5905	8.6297	8.37904	11.1775	2.17389	2.30625	1.1792	16.4466	12.8063	12.4458
BxW-153	70.3773	93.0953	84.7415	202.436	203.329	267.758	16.6611	25.564	47.9452	49.2564	57.5517	70.5102	9.76667	11.4581	12.8882	4.6736	5.46704	9.23438	2.02568	2.10745	1.21872	18.6685	11.8566	10.3491
BxW-155	72.245	103.127	93.6366	202.491	251.888	320.91	20.0611	39.5189	59.5732	48.0402	61.5537	69.5305	9.23723	13.6207	13.3705	4.2431	6.88825	8.67016	2.2735	2.20936	1.42481	18.4231	8.92281	9.79687
BxW-157	77.7242	90.8504	81.2745	222.356	258.99	327.226	25.14	31.8018	56.6366	49.3182	60.8558	68.8477	14.2726	13.0181	12.8906	7.31211	8.00627	8.90045	2.32598	2.08705	1.27533	15.631	10.1929	9.77925
BxW-158	71.8232	103.353	98.6744	252.062	272.418	311.944	28.4376	39.3369	57.7064	53.456	59.7437	66.8461	14.4113	14.8534	13.788	7.91561	9.44345	9.31726	2.24527	1.86693	1.32432	14.1925	10.3575	11.4331
BxW-159	76.6545	95.2736	86.1189	209.706	253.273	329.095	24.01	38.0263	62.1284	49.5819	57.2586	62.9548	10.6377	14.5546	17.3684	5.44758	10.0105	13.0166	2.24305	1.52622	1.07802	17.029	10.9543	11.7951
BxW-16	76.194	109.521	96.9661	248.551	238.574	286.627	20.9814	28.8862	51.3016	48.0657	57.7029	61.487	13.7926	15.4671	17.0116	8.02531	10.1149	12.2892	1.80579	1.89044	1.17373	16.3561	11.5905	13.258
BxW-161	75.0257	107.014	99.8075	201.962	254.299	331.967	17.0422	40.6211	51.5689	47.3862	56.7648	66.6529	7.55687	14.7868	12.9899	3.74622	8.76003	9.70362	3.15379	1.87343	1.05875	19.3346	10.6879	11.5882
BxW-162	76.8458	103.474	89.6511	233.363	274.867	330.884	22.4611	42.72	66.7844	44.5373	57.2498	68.7608	8.71271	13.8119	15.645	2.48841	7.78221	10.6421	2.82279	1.82394	1.27591	20.9694	11.7382	11.0787
BxW-164	74.7817	80.7518	85.0414	247.652	180.634	262.383	23.9093	17.6498	37.2746	48.3849	60.2592	69.1844	12.5718	9.83027	13.8548	5.69758	4.91292	10.0558	2.66237	2.28793	1.17423	17.5791	11.8664	10.2132
BxW-165	69.7586	109.785	93.407	179.102	281.2	208.472	19.1291	33.9897	22.9927	50.8407	55.2441	63.3135	10.3744	14.5676	15.3099	4.45993	8.42914	10.193	2.18514	1.7016	1.35577	15.2942	12.6738	12.0949
BxW-166	79.0404	84.0869	86.4569	270.819	219.423	319.159	27.5701	31.9662	59.9225	54.3169	60.8628	65.0538	12.8078	11.0861	15.2885	7.46104	5.57543	11.0803	2.02843	2.33116	1.14321	15.1448	10.348	12.6169
BxW-167	72.9264	98.9875	86.6115	200.758	233.348	272.887	26.1755	23.4171	47.404	56.0984	63.1371	70.199	15.3734	12.6504	9.24439	9.08423	5.8694	4.76148	1.82246	2.24873	1.88513	12.1076	9.83929	11.5876
BxW-168	69.6341	79.8674	78.4107	201.493	213.834	293.811	16.5742	24.729	63.4265	53.2806	58.0841	68.2065	8.46993	13.1557	14.637	3.14582	8.60537	10.7228	2.774	2.22866	1.13907	18.0755	11.9072	10.8055
BxW-169	69.2377	106.365	102.481	197.17	307.749	353.252	21.5875	43.9486	55.1187	50.8343	60.9612	68.4702	11.567	14.9568	13.2615	6.66664	8.88939	8.80955	1.85632	1.64786	1.36512	16.5243	10.9529	11.4635
BxW-17	71.0837	98.2271	87.7928	264.483	251.827	292.147	30.3751	34.1045	37.8915	55.5474	58.9677	69.077	11.2825	11.8813	13.3868	4.41258	7.23527	10.1198	2.70034	1.92408	1.07795	16.5226	11.9051	12.1325
BxW-170	73.1895	104.66	76.9964	202.932	261.756	275.98	22.3547	34.6047	30.6884	52.3927	60.4027	67.804	10.5096	13.583	14.3616	3.73555	8.50102	9.2603	2.76981	1.76608	1.40429	17.2365	11.5298	10.9822
BxW-175	72.3214	100.82	80.6907	228.898	259.52	306.131	32.4919	25.9111	49.5669	57.0834	58.5463	70.6379	10.3645	14.5272	13.1913	4.3839	8.425	8.80661	2.5787	1.85904	1.40788	14.7463	11.6279	9.99238
BxW-176	70.9055	101.805	87.5542	242.558	258.987	314.81	18.1515	32.2132	58.4197	52.2229	57.2391	67.6367	12.9763	14.6329	14.5033	6.19531	8.57034	10.1484	2.57808	2.28889	1.23045	16.7974	11.3992	11.1889
BxW-177	69.9354	109.548	86.3923	233.537	279.634	320.334	20.0412	42.1367	54.2716	49.5272	56.1488	68.1225	9.69173	15.2392	13.7618	3.54382	9.46714	8.80428	2.89282	2.29224	1.4369	17.2127	12.6412	11.6869
BxW-178	74.0824	97.202	97.2844	256.324	292.199	342.463	26.9283	35.8259	70.8561	53.0185	57.6767	61.4432	13.4943	14.2955	16.7134	6.77027	10.1136	12.653	2.41513	1.73832	1.03384	15.5475	13.3951	13.7017
BxW-179	74.3579	106.888	86.1485	269.814	246.603	317.647	31.7982	24.1197	62.1748	52.4223	52.64	64.1329	12.4835	16.3172	17.2419	7.40148	10.6483	13.9107	1.88287	2.24458	0.897516	16.8534	12.4708	11.0421
BxW-18	76.6895	111.677	100.799	232.985	272.153	316.351	23.376	48.2563	58.758	51.0943	56.9497	65.0374	15.3712	15.2056	15.3798	10.009	9.87335	10.7625	1.74209	2.34641	1.24385	14.6111	11.2478	11.3305
BxW-180	77.3384	109.7	108.063	242.426	256.188	296.471	28.8602	30.8221	47.7368	50.6004	58.6866	65.1374	12.9544	12.4053	14.1438	6.63143	7.81722	10.6427	2.23994	1.84589	1.04468	15.6464	11.9565	12.1897
BxW-181	77.0907	104.668	102.299	200.287	270.351	319.709	20.4181	38.2699	64.9339	46.7692	58.1396	66.9964	11.5887	14.4537	14.2732	5.71479	7.24759	9.55199	2.24647	1.92067	1.35239	18.4788	11.5842	12.8889
BxW-182	76.3972	93.7132	91.3114	232.818	276.694	270.368	22.5969	15.211	31.0948	51.4519	52.3454	65.8849	11.9583	16.9039	12.6201	5.16378	11.6254	8.19595	2.68739	2.15118	1.4541	16.0165	11.6665	9.87918
BxW-184	70.8795	94.5153	90.3503	211.068	244.181	309.312	25.1947	38.7253	55.1786	53.0521	61.2624	66.1977	10.2127	11.5531	15.2208	4.94657	7.14651	11.0712	2.3288	1.95567	1.15911	17.5254	10.4882	12.5908
BxW-185	77.3304	112.711	108.325	201.863	226.871	266.148	14.9566	23.3721	47.5608	44.2826	58.6283	61.8106	9.91085	13.5662	16.4586	3.51643	8.17281	11.4129	2.92211	1.99294	1.25676	18.9116	10.9209	13.4295
BxW-186	70.1428	79.3127	75.8074	225.307	200.827	289.523	25.2071	21.7785	35.2096	52.9631	63.6691	71.4946	9.21475	8.92845	11.2936	4.15105	4.15046	7.15992	2.16684	2.08821	1.45291	16.6967	11.0185	10.5415
BxW-187	69.6207	81.8202	75.1472	220.464	211.434	305.736	19.779	22.4903	56.7872	48.1969	58.4013	63.0942	14.9762	13.2356	17.9935	7.99091	8.73384	13.7117	2.20203	1.85672	1.06254	18.1129	13.1144	12.5912
BxW-19	72.1481	100.839	86.1224	196.767	236.58	305.551	18.8381	28.1232	57.2193	51.7138	55.2979	66.2819	13.8687	15.473	15.987	8.81543	10.0923	11.614	1.74471	2.01045	1.15002	15.4269	11.6174	11.7011
BxW-193	71.2983	110.091	103.914	243.432	296.577	320.611	21.7515	33.9031	61.6225	53.3113	58.4381	62.1982	12.7778	16.2759	16.2012	6.84792	10.9542	12.2811	2.19506	1.626	1.05727	16.1191	11.3617	13.2463
BxW-194	68.8945	82.7247	70.0826	204.245	178.319	266.056	23.4645	17.0558	39.8302	51.7085	59.6228	67.5299	9.97702	11.5079	13.2248	4.81816	8.18696	9.22577	2.10142	1.57114	1.25594	17.4218	11.5478	11.9315
BxW-196	74.0655	83.6801	77.9344	213.055	236.72	311.181	22.2999	43.8533	46.7762	51.8322	58.4526	72.4954	9.39412	11.9252	11.0864	4.41761	7.49894	7.68179	2.21008	2.32467	1.33417	19.2916	10.8759	9.74745
BxW-197	73.0047	103.913	92.1947	231.88	218.609	282.59	27.8286	23.962	48.883	52.6527	56.2907	67.8913	8.65834	14.4749	14.1004	4.11186	10.0718	10.1438	1.9541	2.01664	1.17772	18.4542	13.8392	12.367
BxW-198	72.1295	93.1778	84.8662	248.975	275.502	319.908	27.4856	34.1546	44.9437	52.6304	62.9438	68.6767	12.4316	9.4864	10.6165	6.67957	4.21053	6.96889	2.38592	2.02002	1.36452	18.0093	11.7715	11.3778
BxW-199	67.8096	94.591	85.1787	188.095	246.283	310.487	13.0915	34.8932	65.3814	46.6008	59.9706	68.4906	7.54445	12.0053	14.3431	2.3903	6.00783	10.2349	2.60558	2.46334	1.20286	20.9965	12.6632	12.9669
BxW-2	70.308	85.5381	80.8289	194.209	207.593	268.591	10.5594	17.749	52.0973	47.2653	61.1794	68.8274	7.77816	10.1928	14.7222	2.21231	5.47419	11.0174	2.94909	1.83182	1.09504	21.9184	12.0104	11.4048
BxW-20	71.3823	98.3752	92.2825	224.145	223.736	297.31	25.4597	21.9409	40.9265	55.1854	59.8593	67.4151	10.1851	10.5127	14.551	4.3804	4.71421	9.81405	2.4989	1.9141	1.32878	15.6761	12.8258	12.4392
BxW-200	71.0023	102.273	91.6348	200.568	256.485	308.379	19.8973	28.5014	53.955	53.3191	57.5825	67.096	12.6777	13.3	12.5347	6.62455	7.42524	7.8498	2.21281	2.06861	1.48104	14.4777	11.4517	13.199
BxW-201	74.7208	85.4164	84.9254	227.69	220.685	291.988	31.2317	32.4724	58.1939	54.3803	63.1264	72.037	9.31348	10.891	10.9488	3.60871	4.50481	7.05993	2.8491	2.29872	1.46186	16.8092	9.23452	9.58031
BxW-202	73.6729	107.322	97.9339	209.692	262.652	304.745	20.3208	39.066	63.4357	51.2393	59.7813	65.2007	10.366	12.9867	15.0954	4.60167	7.2241	10.6106	2.72726	1.95208	1.22346	16.9141	10.4064	12.0476
BxW-203	69.745	86.3195	86.1248	237.031	260.484	303.167	25.6702	33.0616	33.6753	49.5686	56.4985	65.6463	11.0604	14.0138	8.58004	5.40651	9.44786	6.75508	2.05765	1.67173	1.36225	18.2858	12.9964	13.5398
BxW-204	72.0435	90.546	87.8394	200.135	251.265	305.426	19.8458	30.3692	53.2494	50.5555	60.5447	65.3307	13.6938	12.6171	15.4231	6.81709	8.10578	10.8309	2.17091	2.07089	1.23435	16.4856	11.1595	11.7633
BxW-205	76.6073	106.926	96.9805	219.154	305.567	341.211	24.4181	41.9205	59.7277	50.6663	61.2324	69.2014	12.884	13.2293	12.9573	6.83962	6.80048	8.44512	2.13096	2.02239	1.41918	17.0859	8.40118	9.92136
BxW-206	74.5604	102.411	87.3495	230.396	262.02	295.174	25.9514	30.5194	36.2724	52.2699	61.424	70.2498	13.1169	12.3888	11.4193	6.88936	7.13704	6.9894	2.21425	1.85923	1.52991	15.7703	12.0575	12.4721
BxW-207	73.1204	105.066	103.084	212.655	267.782	329.135	28.0891	38.0316	77.861	60.7124	57.6541	64.6585	11.4321	16.6467	16.1761	5.44725	10.5511	11.7198	2.43052	2.18209	1.11251	12.7319	9.48701	12.0546
BxW-208	73.0166	106.405	98.7964	228.471	277.634	313.381	28.2263	36.7468	62.63	53.3847	61.3944	69.7067	10.4133	14.5115	13.7193	5.33359	8.65221	6.62033	2.21093	1.88348	1.47274	15.8158	8.80477	10.3308
BxW-209	72.9779	106.201	105.658	205.646	278.004	330.114	10.1792	41.8852	59.5565	50.3717	59.6306	67.13	7.38822	13.3511	13.7977	2.56818	9.12659	9.52214	2.37308	1.69677	1.30321	18.9036	10.0568	10.9615
BxW-21	76.6251	97.5114	86.698	215.421	242.868	303.862	23.5122	27.5124	50.4136	49.8564	61.3409	70.6444	12.7794	9.53821	9.60508	6.84495	5.44965	5.84235	2.23907	2.17981	1.58627	16.0628	11.1327	11.9642
BxW-210	70.8793	105.239	97.6885	218.844	238.221	285.324	24.0934	31.907	48.2685	52.3803	56.8753	60.2268	12.7776	16.1566	16.5	6.53513	11.0893	12.4983	2.33194	1.79311	1.04952	14.9364	11.2934	12.8069
BxW-212	78.7504	86.1857	80.9621	208.625	232.722	311.699	21.9273	22.5644	53.7538	49.5304	61.2474	69.6171	12.3388	12.0285	14.0428	6.91767	6.96156	9.64191	2.00425	1.9473	1.27202	16.2916	10.5993	10.259
BxW-213	71.75	106.699	96.1796	226.606	248.874	288.959	30.5064	25.0489	47.0084	57.6488	56.3113	64.2241	9.34129	14.4152	16.7388	3.29996	10.1957	12.8575	3.12295	1.78436	1.02338	14.0059	12.1423	12.0362
BxW-214	76.6575	101.263	97.812	239.541	265.405	307.578	23.6225	37.4394	53.6681	52.833	58.5107	69.9609	14.2875	14.4805	13.5707	8.72138	8.46336	8.73072	1.83918	2.02919	1.4428	14.1311	11.846	10.5138
BxW-215	70.4388	108.824	97.7479	241.307	280.792	326.153	20.0315	40.8232	75.0548	53.721	56.3428	65.0964	9.79898	14.9325	14.3491	3.5543	9.15648	10.4011	3.08816	1.98295	1.13958	16.5541	10.299	11.0518
BxW-216	71.9097	90.5117	81.3307	225.28	243.861	300.309	24.6072	30.043	55.3842	55.9919	60.5192	70.2282	8.98269	13.2374	11.1171	3.25527	7.68364	6.67914	2.71346	1.91708	1.57768	15.5646	10.101	11.5355
BxW-217	71.4272	92.079	83.789	247.888	211.697	285.349	30.8881	21.5599	45.2602	53.463	61.4813	70.5327	12.276	11.7647	10.1332	6.15745	6.34198	6.07292	2.39017	2.01721	1.68874	14.9024	10.8475	10.7838
BxW-218	69.6892	98.1808	85.4342	234.976	282.413	306.651	27.8529	41.0025	45.5794	54.809	58.4477	65.4806	9.13231	14.7391	15.7903	3.9268	8.62913	11.4216	2.27132	1.53148	1.15629	17.3342	11.6329	12.3466
BxW-219	67.8169	92.7447	82.6468	176.717	253.381	324.867	9.45458	24.0015	69.1736	45.1721	62.4072	67.1417	11.5171	9.94517	13.9719	5.5368	4.18371	9.9039	2.28782	2.39631	1.20916	19.8547	12.2947	12.2342
BxW-22	75.8626	80.1487	70.0914	251.592	172.428	242.501	36.0467	9.51173	39.836	52.0928	60.9136	66.5523	13.7279	9.44235	14.3919	8.36079	4.10565	10.1483	2.19057	2.41471	1.19938	13.7275	12.8549	10.8561
BxW-220	74.8539	112.887	96.9208	254.839	273.564	332.836	24.1586	44.5348	67.4874	52.9765	58.0876	67.2577	13.4802	15.7072	14.7804	5.6965	9.83007	10.445	2.46912	2.18907	1.22415	16.0881	9.72002	11.1184
BxW-221	73.9536	95.3704	88.2609	226.55	280.075	333.257	25.651	38.8295	61.5913	55.7191	59.0206	67.8089	11.338	14.7844	14.9974	4.76569	8.90398	10.4274	2.29162	1.99007	1.25959	16.6513	11.7294	11.9126
BxW-222	71.1252	108.064	96.9682	224.48	278.374	307.746	33.8688	42.6234	51.0651	51.5697	60.7826	67.6525	12.9412	15.0632	14.5926	6.94524	7.8811	10.0214	2.39162	2.13138	1.2893	16.3118	11.0321	12.7675
BxW-223	71.2697	89.6444	81.0146	247.008	223.898	291.775	27.0885	23.1759	47.082	51.997	59.253	66.0794	8.94589	13.0416	15.0312	3.41397	7.82891	10.8014	2.39494	1.71909	1.15852	16.7706	10.5636	11.4568
BxW-224	76.7224	99.1254	99.6071	258.212	296.171	341.797	30.5919	47.1539	47.7523	51.7458	62.0541	69.2019	11.4889	11.3489	11.3803	7.04427	6.63054	6.39152	1.90669	2.0678	1.71769	16.5734	9.82463	11.3514
BxW-225	79.2041	100.113	91.2198	249.939	261.167	303.975	32.371	30.17	46.0997	54.2717	61.4489	67.6345	13.3864	11.9505	12.2659	8.393	7.51374	8.47132	1.73362	1.5815	1.25371	13.7555	10.8813	11.7293
BxW-226	69.114	105.953	85.0037	215.484	290.689	354.984	11.875	41.5658	65.4309	48.9486	59.0068	68.3286	13.2063	14.198	15.0829	7.54176	9.85254	10.9125	2.19854	1.73092	1.18497	17.4982	10.8461	9.98186
BxW-228	67.2007	85.635	79.9814	208.468	203.186	309.265	19.607	19.8147	40.5337	46.9724	60.4064	61.0184	9.72945	12.6347	17.3113	4.62089	7.54137	12.8049	2.13725	2.08732	1.09797	18.4143	10.707	11.9982
BxW-229	74.644	82.5353	80.9175	253.939	180.459	263.15	23.9717	11.0456	24.775	50.8913	60.0559	69.7216	14.7143	13.5229	13.8158	9.65532	7.99559	9.46136	1.72694	1.81199	1.32862	16.2394	11.5935	10.7261
BxW-23	76.6788	98.1413	89.899	233.61	288.032	341.915	26.8315	39.0824	87.5365	51.6097	61.09	68.1232	13.0095	15.1467	15.7692	6.64873	10.4457	11.5163	2.47863	1.85693	1.15494	16.522	10.8141	11.3912
BxW-230	68.3369	112.898	103.717	198.52	257.617	293.069	6.0608	33.2459	50.782	51.8575	58.2939	65.5998	7.59111	15.5543	14.6118	3.17748	9.96332	9.90178	2.46836	1.85381	1.32033	18.1324	11.6585	13.0528
BxW-231	75.0761	93.0181	87.5948	226.261	228.051	276.527	13.755	29.4431	51.2765	50.0288	63.6862	69.5439	12.8061	9.37699	13.6035	7.87829	4.77015	9.11889	1.84584	2.22402	1.35206	15.3125	10.3726	11.3248
BxW-235	70.7623	92.7269	83.3825	175.62	228.954	302.182	19.0611	28.3567	60.4821	47.1725	60.3458	67.7887	12.003	13.5133	15.8926	5.84124	8.83736	11.8904	2.2266	2.16143	1.09627	18.4714	10.9736	10.9917
BxW-236	72.0652	79.6514	98.0478	228.979	173.241	318.615	22.6211	22.7051	57.69	49.8613	55.9413	61.9654	14.1341	12.759	17.4345	8.1968	7.96589	13.0877	2.21316	1.49919	1.07053	16.5614	10.7543	12.1507
BxW-237	74.578	109.198	96.8134	244.933	240.837	332.719	27.836	27.7724	59.8703	48.0085	51.3528	60.1668	14.0861	17.1321	17.1191	7.58479	10.7334	12.9686	2.34065	1.90073	1.06463	17.6508	12.4352	14.2927
BxW-238	68.9803	108.576	97.2317	205.885	280.751	333.55	22.3121	33.2968	73.4096	48.4161	57.8513	64.3571	9.26237	15.4437	16.8402	3.19195	8.77988	11.8976	3.10803	2.23945	1.20075	17.7787	12.2501	13.2594
BxW-24	76.8261	85.7604	85.0219	268.739	192	281.509	27.7265	22.3214	32.7599	52.7762	61.4688	67.5857	15.651	9.80609	14.3762	9.72045	4.62027	8.41162	2.0776	2.43845	1.63464	15.4754	11.4745	11.5408
BxW-242	71.8319	107.34	100.793	217.091	298.311	340.792	20.5003	38.9404	49.8068	52.6763	56.3286	63.4594	12.9542	15.8972	14.6662	7.03173	10.3278	10.1662	2.5529	2.00003	1.26908	16.5033	11.5627	11.7487
BxW-243	71.2755	80.8426	83.055	216.922	176.037	296.375	29.789	17.4513	66.8188	48.4425	58.7863	71.4008	12.3317	10.4842	11.1887	6.0486	4.6799	7.84819	2.92242	2.34129	1.2306	16.8811	12.7317	10.5776
BxW-244	75.1346	101.85	90.4037	220.475	208.723	279.858	19.3749	32.1502	62.2559	49.5422	58.2114	70.4561	11.7025	13.2004	11.8913	4.45647	7.56702	7.83086	2.98154	1.8274	1.40358	18.4083	10.2255	11.1312
BxW-245	70.9877	105.644	95.2941	232.411	260.503	330.747	26.0724	34.8139	59.768	49.4943	57.2982	66.6759	13.6439	15.948	15.1084	8.22438	10.0618	10.8826	2.00338	2.1604	1.21424	17.6621	12.2646	12.6201
BxW-246	71.4279	106.337	94.6548	197.965	269.201	297.237	18.1883	45.1357	70.3748	50.4774	56.4485	63.1852	11.7896	14.4589	13.6773	5.43864	9.39785	9.26115	2.40905	1.7321	1.32391	16.9103	12.6822	11.5701
BxW-249	77.7213	103.165	100.608	259.598	256.484	316.336	36.6368	32.5781	63.5901	53.6579	56.0238	66.45	13.5308	14.6663	15.1495	6.70266	8.84549	11.5105	2.32691	1.70457	1.02278	15.6099	11.3346	11.3063
BxW-25	69.7165	105.369	92.4618	219.493	292.304	332.096	29.0012	44.9919	65.6239	50.6032	56.617	65.7155	14.2579	15.0282	15.4429	9.38908	9.3971	11.2214	1.68036	1.85649	1.18022	16.0957	11.1452	11.4685
BxW-251	71.9063	107.391	88.1914	238.197	260.25	315.538	30.0346	33.339	45.5163	47.1749	58.093	64.5666	11.4485	14.7442	17.5244	5.24454	8.06217	13.0189	2.37031	1.95612	1.10135	18.5625	11.3956	12.2583
BxW-253	75.3223	108.06	87.3815	256.772	256.566	310.371	42.3937	28.0438	35.81	54.5658	61.1429	68.7792	12.8661	13.3685	11.0518	6.72987	7.36984	6.77089	2.35465	2.45431	1.53378	14.7375	9.84497	10.963
BxW-254	73.0698	98.9703	87.6839	215.75	273.377	348.519	26.9983	47.6003	54.5	54.9357	60.3329	69.3119	10.8769	12.8588	14.4138	4.40021	7.66655	10.2771	2.99822	1.7184	1.19291	14.8746	10.6421	10.7563
BxW-256	74.7598	104.443	98.0894	249.112	262.914	271.237	31.9262	34.7503	54.049	52.8554	60.4172	69.9267	13.358	14.0943	12.5661	6.18714	8.39222	8.1581	2.38557	2.20216	1.3821	16.1886	10.5985	11.5939
BxW-257	73.7797	105.999	97.9681	228.311	275.637	314.911	19.869	42.3264	59.4518	50.9744	57.5013	69.7419	13.9609	14.1443	15.0365	7.80748	7.89628	10.4097	2.08515	2.00106	1.26762	15.5821	10.9908	10.8144
BxW-258	67.1618	107.096	97.9931	193.423	284.495	320.49	21.2433	41.5917	62.5092	49.5636	58.0723	66.4687	10.6235	14.8215	14.554	4.30622	8.59707	9.99381	2.76892	2.03511	1.29532	17.0356	11.268	11.5016
BxW-259	78.652	80.9406	93.4615	218.778	204.404	318.925	25.3259	19.2471	62.0988	51.89	61.6101	64.214	11.324	10.617	14.9764	5.1802	4.821	10.3619	2.64669	2.59147	1.2953	16.881	10.9501	11.2088
BxW-26	71.1565	107.068	106.002	233.773	269.328	317.876	24.439	36.0885	71.2753	55.378	57.8733	62.717	13.7404	13.6406	16.8242	7.05617	8.73373	12.7723	2.48564	1.95156	1.05318	14.9976	11.0852	11.9131
BxW-260	74.1137	101.695	80.9156	223.503	266.394	311.818	24.911	29.0101	45.4337	48.0889	62.1209	68.4828	11.2774	13.3337	14.1664	5.81633	7.49389	9.53057	2.22775	1.92727	1.32208	17.3626	10.7564	10.4955
BxW-261	72.0473	101.057	92.7444	240.439	231.773	317.735	25.8707	30.0446	56.1558	51.806	59.8926	69.81	12.317	14.2156	15.4082	6.7194	8.4742	11.0738	2.23976	1.83068	1.16898	15.544	10.9123	11.5505
BxW-262	77.7263	94.9865	91.5784	235.219	268.433	331.266	24.0887	36.3725	72.6973	51.1401	59.854	68.5474	13.4349	13.8898	14.326	8.30015	7.89109	9.35806	1.60251	2.3292	1.35696	15.1427	10.143	10.1916
BxW-263	70.5719	109.017	97.923	213.548	266.341	327.533	19.9886	37.2181	59.6949	51.1211	61.1234	67.8435	11.631	13.6721	13.8741	4.42995	9.17445	9.87612	2.82948	1.95902	1.21654	17.4797	10.912	12.0037
BxW-264	76.9956	93.9923	84.842	272.152	206.732	283.791	36.6982	25.6962	44.9859	53.881	57.8141	66.8407	13.1005	12.4161	14.6004	7.60198	7.16149	9.69811	2.11391	2.24274	1.32755	14.998	11.788	12.4906
BxW-265	71.1373	93.2068	85.0134	234.723	261.763	351.703	19.2343	30.3939	61.7958	49.6944	57.35	63.523	14.311	13.7135	17.2332	8.06174	8.44899	12.4051	2.266	1.97704	1.18262	15.8619	12.4016	12.7743
BxW-268	74.3675	105.927	88.7905	248.494	268.178	334.868	28.5484	36.2863	77.1904	54.243	61.761	68.019	10.5228	13.4325	15.2318	4.93506	7.68608	11.199	2.46221	1.86158	1.16673	16.2212	10.1034	11.3261
BxW-27	71.1994	98.1575	92.0723	207.345	272.727	310.371	26.6901	41.5624	64.3293	51.4513	59.4481	65.0093	8.30047	13.696	16.0754	2.92195	8.93289	11.889	2.40446	1.60753	1.10508	16.7504	11.2313	12.3426
BxW-271	76.1033	91.2383	85.9071	248.8	239.984	308.596	26.455	24.9607	45.9589	53.3894	61.7564	71.4847	13.6689	11.5012	11.7075	7.58684	6.3928	7.61711	2.22605	2.03219	1.43673	14.7925	10.3811	10.7239
BxW-274	74.2548	108.021	100.675	280.383	272.766	324.6	30.0392	46.7798	59.7044	47.0215	61.3409	65.8285	14.8762	14.2721	14.1887	9.03924	8.53874	9.81972	1.96888	1.95055	1.28436	16.1527	10.1271	11.5662
BxW-276	72.3227	93.8058	105.708	293.224	267.252	325.616	32.1908	27.2446	57.5213	47.7265	58.5772	66.5101	14.7267	14.3459	15.4623	7.78625	9.82979	11.2395	2.19566	1.6333	1.16041	16.6363	10.6515	11.5643
BxW-277	72.3855	89.6514	84.6334	196.421	268.44	315.422	15.4082	32.5949	53.1943	51.2593	60.2731	66.3705	8.37562	13.5765	15.9213	3.35371	9.04141	11.1377	2.61514	1.78827	1.24898	18.2859	11.4907	12.2961
BxW-278	72.3257	98.3376	97.0461	249.699	210.867	266.416	20.9753	29.2467	55.2677	52.0838	61.3406	67.3821	13.4009	11.6107	12.5232	7.45862	6.85104	8.33143	1.84888	1.70715	1.39519	16.8215	11.4818	12.0579
BxW-28	73.0431	96.2936	86.4255	252.827	246.921	311.524	21.5499	31.8747	54.2006	49.26	59.0467	65.5718	12.4686	12.9443	14.9732	6.40981	8.62012	11.2587	2.0071	1.84125	1.073	17.93	12.1767	13.3814
BxW-280	77.2536	84.1257	85.034	222.375	238.099	298.578	25.0533	25.8907	38.7552	49.2668	59.2812	67.2686	10.8487	11.2546	12.0598	5.8227	6.53344	7.93273	1.95425	1.9814	1.3696	17.6176	13.228	13.0715
BxW-281	74.9933	105.35	90.4431	272.31	252.679	302.896	33.9319	38.1785	46.5238	53.6677	61.7481	69.7611	14.3555	12.0837	12.57	9.03684	7.03846	7.77301	1.82177	1.97122	1.50539	15.3955	11.055	11.9153
BxW-283	75.9293	110.569	106.127	228.967	316.379	382.02	26.3086	52.0159	81.7763	48.1669	56.7931	67.7424	12.8116	15.4444	15.0369	6.43231	10.491	10.8041	2.49939	1.99543	1.18529	17.0748	11.8378	10.9365
BxW-284	73.8479	107.93	98.1877	249.912	279.156	338.318	22.3442	39.8957	60.3096	49.0142	55.9979	61.6703	12.7725	15.7835	16.2914	7.55038	9.96352	11.7329	1.93399	1.88123	1.15993	17.6231	12.0656	12.9191
BxW-285	74.2053	92.9855	80.9527	259.392	276.977	343.082	29.0469	28.5753	60.5124	50.3394	57.7731	65.6523	12.5815	14.2972	15.6668	7.37967	9.06594	11.5935	1.84465	2.07573	1.08911	16.936	11.2746	10.7751
BxW-29	75.6561	115.767	96.5423	218.581	279.097	323.552	27.9956	34.1855	64.8672	48.9176	59.7845	64.975	9.28752	12.9142	15.9788	3.99071	7.60624	12.2211	2.87147	2.16435	1.038	20.074	11.9364	13.2544
BxW-3	73.7619	110.559	104.023	225.828	245.818	267.028	24.3111	39.5873	71.4074	49.485	57.4273	63.6314	11.8388	14.3539	13.9729	6.52324	8.96671	9.31137	2.21218	1.95336	1.34669	17.1466	11.4544	12.4454
BxW-30	76.9217	99.981	85.1794	246.124	241.98	304.433	39.0038	32.239	60.0926	51.8329	56.1594	68.5029	12.4643	14.7802	12.4733	7.6007	10.0447	8.73794	1.93527	1.77362	1.2549	16.6205	13.3241	11.8218
BxW-31	77.3031	102.017	86.0989	231.479	270.917	328.417	28.4194	37.3145	57.955	53.7246	56.509	67.94	11.7525	13.6811	14.4978	7.06165	9.51258	10.2707	1.95912	1.89154	1.21779	15.1575	12.4583	11.9964
BxW-32	70.8684	104.684	104.245	207.356	250.368	331.185	25.0536	32.9932	65.9985	52.3987	59.5958	65.3677	7.57258	13.5257	14.0101	2.25065	7.02756	9.30312	2.5638	1.99587	1.37099	17.5807	10.7806	10.9247
BxW-33	73.2791	105.712	100.425	239.038	244.179	303.167	25.5377	27.4352	55.0753	53.1978	62.5	66.5563	11.8881	10.5101	13.5451	6.07241	4.77668	7.9274	2.36246	2.39141	1.61606	16.4276	10.2622	11.0657
BxW-35	69.216	103.55	86.5573	198.737	273.488	312.715	15.1302	35.0652	48.7386	47.0332	60.4045	65.3351	9.4264	13.7788	16.7004	3.92987	7.96342	12.0974	2.48917	2.40945	1.14413	18.2678	11.9246	13.7305
BxW-36	73.8476	81.5657	88.5349	224.128	243.742	309.834	22.1603	24.5931	55.3762	52.6516	54.2603	66.8542	14.7612	15.1072	15.651	7.63079	10.3072	10.5881	2.32774	1.68985	1.3027	16.23	10.3977	10.8922
BxW-38	72.1618	107.713	97.9949	242.664	276.285	329.379	21.1683	35.8627	59.9412	51.4809	59.5025	65.9019	13.0103	15.6155	15.3222	6.78604	10.2686	11.1826	2.49941	1.80554	1.15052	16.8221	10.1876	11.8586
BxW-39	69.9271	100.639	85.5243	193.885	273.771	336.908	16.0324	33.6357	68.8047	49.4533	57.064	65.6242	10.0198	14.743	16.5244	3.79771	8.74488	12.2122	2.74674	2.16739	1.10887	18.9116	11.7155	12.2333
BxW-4	67.6184	80.9506	78.501	216.346	187.832	262.488	23.0874	11.8595	38.9643	51.9753	63.5601	66.9341	9.02826	11.1519	15.0953	3.31527	5.9855	10.5586	2.51694	2.60312	1.24447	17.2099	12.7759	12.1349
BxW-40	70.1772	90.9365	72.0605	130.656	233.237	268.755		28.3564	45.5065	16.4954	63.9543	71.1633	8.64961	11.8208	12.1295	4.8735	6.49282	8.43167	1.9706	2.16066	1.26584		9.8636	8.95859
BxW-41	74.3072	86.5401	78.5604	186.483	157.286	288.782	20.0277	18.1194	34.9191	44.994	54.5627	68.6507	13.5927	12.5733	14.0642	7.34368	7.4084	10.0092	1.90751	1.71187	1.19217	16.3611	11.7369	10.7025
BxW-42	70.9735	84.6766	79.8286	227.985	210.942	288.682	21.7059	22.0787	48.7072	49.824	60.3315	68.9559	10.4645	11.6869	11.8389	4.63299	5.63772	7.54011	2.31142	2.09358	1.49402	17.8554	11.848	12.4038
BxW-43	72.2259	89.9824	83.8102	251.441	259.897	324.071	26.8637	35.1712	56.2724	50.4126	55.7743	61.1222	12.2162	13.6572	17.1943	6.51805	8.85826	12.8977	2.12362	1.84561	1.04918	16.9273	11.7299	13.2707
BxW-45	69.6716	92.1502	87.6839	237.541	235.768	307.235	23.3119	23.9908	46.2249	53.3137	60.4199	67.0536	9.14997	14.152	16.0725	2.62846	8.27014	11.3601	3.30807	2.28604	1.1957	17.2311	11.7019	12.6456
BxW-46	76.3988	108.299	98.7493	234.506	273.936	339.398	26.808	33.0289	58.5972	53.0259	59.2871	69.2684	12.4165	15.1067	14.0795	6.16504	8.54963	9.7115	2.23866	2.1998	1.30859	15.2383	9.66445	10.3192
BxW-49	68.1954	92.276	80.0756	222.242	223.655	306.002	25.8724	24.9345	55.7502	52.0723	60.6566	71.2455	9.42463	12.2498	12.7327	4.17774	7.26438	8.74444	2.29998	2.13473	1.30584	16.8702	11.2452	10.8644
BxW-5	77.9834	98.9394	106.388	231.38	265.509	329.272	24.5894	31.4758	57.7244	54.2779	58.0206	67.2303	11.248	13.5376	14.9423	4.72688	7.66043	10.5016	2.68461	1.87461	1.26772	16.1242	12.0775	11.031
BxW-50	79.0808	110.601	96.9127	216.399	287.283	343.303	19.5873	40.2084	76.7109	46.9697	54.1061	58.5594	13.0189	16.7952	16.7289	8.3731	10.9184	12.6815	1.69338	1.70284	1.0428	16.502	11.7814	13.0223
BxW-51	72.5853	100.153	87.1317	234.471	252.154	297.649	25.9138	28.8147	45.245	52.1775	62.8432	71.927	9.51436	9.31189	10.1713	3.54387	3.49348	2.51032	2.56793	2.19517	1.95072	16.9556	10.9861	10.414
BxW-53	69.0672	102.982	93.3332	207.146	229.948	299.618	23.5126	34.1806	56.2448	48.7707	61.9108	70.1637	8.0702	12.1288	10.9714	2.63898	6.17485	7.24088	2.85732	2.1859	1.38021	18.8674	9.99103	11.1132
BxW-54	75.9218	108.318	104.03	221.977	273.492	320.125	31.5913	39.4577	66.3234	57.3255	58.8862	66.5425	7.28195	13.2256	13.9906	2.59899	8.44587	9.78424	2.33702	1.72277	1.24084	15.0268	12.7744	11.0464
BxW-55	75.7959	101.325	106.004	246.804	253.938	324.593	32.8574	30.8202	43.8968	53.9485	59.8735	65.4496	13.1966	13.6689	15.0693	7.28759	7.70884	10.9948	2.13168	1.94448	1.14842	14.3078	10.6278	10.0878
BxW-56	73.9944	103.007	88.5528	221.341	261.021	312.767	20.6413	31.0518	46.0776	49.8399	56.1337	64.6945	9.75587	13.8802	13.9084	4.87439	10.0315	10.0195	2.09613	1.79945	1.20288	17.2295	12.2126	12.8454
BxW-57	75.8258	96.7522	90.0373	227.682	266.069	301.257	26.3099	34.1547	58.331	55.318	57.5805	67.8506	10.9623	14.0707	14.6847	4.74855	9.05461	10.2304	2.72221	1.64818	1.24044	14.4435	11.5548	10.8798
BxW-58	74.3275	94.9231	91.3146	228.232	249.645	328.276	26.6006	33.9144	56.5978	51.2581	58.3738	66.4468	10.1558	14.5078	14.9545	3.81297	8.69775	10.6974	2.79529	2.12509	1.18255	16.6406	10.7332	11.7804
BxW-59	67.6166	87.5135	76.9381	203.709	202.525	301.873	13.1441	17.3852	57.7296	46.1982	62.4515	68.1829	10.959	10.3204	14.5877	5.66797	5.72939	10.6547	2.08662	2.05962	1.19559	18.5805	11.7454	10.4997
BxW-6	71.9471	98.7467	88.788	228.198	273.767	299.107	28.1788	32.1242	72.4336	53.8148	59.6579	66.943	11.1437	11.2759	14.9877	5.88708	7.37639	10.0424	1.93131	1.97191	1.349	15.5379	11.3473	12.2895
BxW-60	72.0382	85.0192	78.6463	209.775	198.454	291.337	21.6323	23.7114	44.5905	46.3763	63.7531	65.9461	10.4105	9.08793	14.4926	4.76117	4.79245	10.7945	2.33343	2.06705	1.06157	19.1117	11.0207	11.5524
BxW-61	77.9865	108.454	101.296	210.347	233.056	300.666	22.0742	33.7833	68.1731	54.3683	58.0457	66.7622	11.6188	13.5458	13.8399	6.65132	8.06416	9.9037	2.06891	1.99045	1.21321	15.8612	10.6742	11.2798
BxW-62	76.9858	103.072	96.744	243.335	269.112	308.219	25.621	37.2446	60.5622	54.1348	58.8579	66.7642	12.3044	14.1494	13.9911	6.41697	8.42043	9.71452	2.54454	1.69124	1.27015	15.5911	10.6198	11.1249
BxW-63	69.9245	99.5261	86.4226	224.384	250.731	299.051	17.7219	31.2608	61.9275	53.5739	63.0898	67.6381	9.83554	12.2321	14.7262	3.69129	6.17243	10.1257	2.68438	2.1355	1.27369	16.9193	12.1551	12.4679
BxW-65	70.4204	101.647	77.4921	182.471	0	229.708	15.6518	0	29.9341	44.7312	0	64.2366	10.7528	0	14.1911	5.39348	0	10.2555	2.30299	0	1.20339	19.1921	0	10.9442
BxW-66	75.0047	113.322	99.0835	210.464	272.123	317.818	27.2559	39.6687	55.3784	52.6365	61.0452	65.0992	10.8904	13.6074	14.8667	4.97176	8.94816	10.7119	2.42285	1.60486	1.16299	16.8528	11.2765	12.4525
BxW-68	76.2775	109.109	98.1071	209.825	263.73	307.564	27.9925	39.52	51.4942	50.2206	59.774	67.4059	12.21	13.3455	12.3452	5.9159	6.98875	8.57742	2.45144	2.09728	1.24104	15.9695	11.1963	11.8142
BxW-69	76.6706	94.1596	83.6657	245.796	281.51	333.885	31.0778	32.3814	66.1438	50.3224	59.2914	70.9253	13.4465	14.605	15.3664	8.43936	9.58719	11.4576	1.84037	1.83709	1.09782	15.8546	10.8263	10.6781
BxW-7	74.5916	97.2682	87.8709	252.476	265.527	356.334	23.7763	32.8482	73.7953	51.6835	58.3644	63.8244	14.3254	15.8047	16.843	8.26297	9.67909	13.0295	2.10108	1.88334	0.973515	15.1686	10.1706	11.3431
BxW-70	67.691	83.5507	77.1373	225.126	200.123	294.319	22.3744	9.06776	48.9331	52.0951	61.2628	67.2461	7.52015	10.37	14.1363	2.47611	5.4818	9.9672	2.64379	2.09036	1.22511	17.5297	11.5712	11.9212
BxW-71	69.8307	87.8715	79.66	220.371	216.623	290.486	14.4643	25.63	37.0835	49.6766	61.2866	68.572	9.28539	12.0467	14.6627	3.1745	5.70005	9.74431	3.1238	2.35451	1.3503	19.4771	11.9135	11.4345
BxW-72	70.7128	84.8968	82.2232	228.976	217.344	300.086	21.9256	19.7886	59.4762	48.6935	59.5905	63.1178	12.3804	10.7471	15.8318	6.71751	6.63088	11.951	1.91489	1.49996	1.06235	17.048	11.5798	11.7714
BxW-73	75.2923	101.694	89.0609	184.199	209.74	285.342	14.6783	27.1478	65.2664	47.2384	58.756	62.5934	9.91158	13.4762	17.531	4.24027	8.49487	13.5054	2.3407	2.05005	0.973522	19.2642	11.948	12.6867
BxW-74	79.7616	105.93	95.9466	235.509	291.452	316.306	33.4727	51.931	53.0712	52.025	59.1714	70.2865	12.8183	14.8242	12.3335	6.80631	9.31978	8.56959	2.15374	1.86087	1.28051	14.1361	10.1446	10.6591
BxW-75	69.6711	80.0146	81.0479	224.825	206.496	285.603	25.6466	25.9437	38.962	50.5674	59.7622	71.0168	10.5402	10.3251	9.81808	4.55663	5.29891	5.72981	2.27654	1.97236	1.62951	17.5741	11.4192	11.0342
BxW-76	71.2588	93.4599	89.4757	248.597	258.52	283.739	29.7634	35.2853	57.5045	54.0131	62.3664	68.8872	11.9936	12.8756	13.7191	5.17071	6.41123	9.61827	2.78793	2.1084	1.25764	15.809	10.5211	12.3397
BxW-77	75.3286	108.32	100.48	237.898	293.469	322.007	34.123	40.7822	67.8813	54.3056	59.5114	65.8992	10.948	13.0284	14.6955	4.75894	7.34086	10.1118	2.9017	1.89514	1.30518	15.1191	10.1862	11.7037
BxW-79	74.5555	104.518	101.965	273.236	287.394	328.412	32.0147	36.8795	65.8062	60.2551	60.85	69.3449	10.6004	12.9468	12.7168	3.71627	6.80125	8.42652	3.0492	2.43574	1.36409	13.9431	12.1351	10.6728
BxW-80	79.0326	94.2339	89.6725	152.371	216.593	322.172		18.0384	60.7272	40.3844	57.3291	70.2615	13.6364	13.681	14.6008	7.37243	8.45853	9.61633	1.95618	1.8298	1.37392	18.7141	12.2751	10.7991
BxW-81	75.4463	109.32	105.58	221.528	249.767	329.104	28.8599	36.2769	76.3571	50.3985	57.3604	62.3407	13.6632	16.1744	15.8135	6.58189	10.7664	11.0956	2.41573	2.20145	1.22986	15.6368	11.5785	12.6143
BxW-82	76.0006	107.565	95.9782	249.959	296.157	329.398	25.4195	24.3695	68.529	50.7289	61.3372	60.7518	11.9853	12.2487	16.1767	5.97546	6.77843	11.8095	2.23293	1.98374	1.18361	17.1286	10.9541	12.9376
BxW-83	79.9584	108.17	87.6511	263.478	301.227	334.559	31.8375	42.6027	76.399	47.0781	57.4466	61.8386	17.0246	15.4307	17.7292	11.5654	10.7007	13.6068	1.55325	1.85069	1.01185	16.2219	11.8125	11.8992
BxW-84	72.0437	103.969	103.786	200.658	239.625	307.962	18.7937	34.6266	74.5005	51.9317	60.407	65.6507	8.67692	13.4249	15.1364	3.13536	7.98721	10.8944	2.83122	2.13	1.15661	17.6259	10.9836	11.365
BxW-85	73.6903	99.3452	89.579	224.125	270.569	327.838	23.758	37.63	70.6736	49.111	53.6103	67.4292	14.4757	17.1441	17.7205	8.66722	11.3982	13.027	2.16115	1.70524	1.10364	16.6175	10.4319	11.6302
BxW-86	71.6487	99.4042	101.814	183.27	199.181	205.477	16.2507	24.7219	25.5264	51.9458	56.842	70.7752	11.1083	14.6947	11.9468	5.61371	7.71595	7.3196	2.20628	2.47479	1.53407	16.045	10.5878	10.3083
BxW-87	75.2261	102.413	84.8811	222.163	241.366	289.528	22.0243	24.5091	34.5931	47.3365	57.5594	68.8444	12.8614	13.481	11.8821	6.62094	7.63316	7.51507	2.12147	2.42438	1.47424	17.7866	11.7514	10.796
BxW-89	69.6992	86.9074	82.446	215.231	221.689	268.185	28.7111	22.9361	15.2304	55.3668	59.7939	68.9514	9.72373	11.6455	12.5846	4.02324	6.1302	8.5727	2.25913	2.40622	1.28337	14.356	12.2641	10.347
BxW-9	77.2354	102.392	106.054	262.894	276.318	328.241	33.5444	29.6643	53.0408	52.6172	59.7993	67.4968	11.4407	14.486	15.3374	6.28012	9.84427	11.399	2.24246	1.65896	1.10256	14.9772	9.88189	10.9428
BxW-90	75.7084	99.7766	87.5844	300.497	297.837	357.072	51.7165	35.9083	55.4869	51.6585	56.5531	64.0176	15.3948	14.3234	16.5757	10.229	9.20269	12.964	1.69907	1.93996	0.908544	14.4719	11.5118	12.1892
BxW-91	73.5434	87.7434	82.2162	254.14	226.278	320.27	32.0155	26.6335	63.5502	52.8693	62.3669	64.0417	13.7217	10.6321	16.3958	8.31619	4.5038	12.1754	1.99378	2.73144	1.09514	14.8082	10.781	12.0304
BxW-93	76.592	94.3939	84.9508	256.383	239.846	312.934	33.8237	38.6126	73.7365	55.8944	59.6473	69.9201	12.4166	13.45	13.7509	4.89444	8.51413	9.58763	2.69996	2.02596	1.30563	14.0166	11.3213	10.4982
BxW-96	77.1959	108.883	86.5364	237.951	278.657	309.463	30.6062	38.233	73.9144	50.5589	56.0538	62.8309	14.7985	16.4999	17.0192	8.50844	10.2661	13.0201	2.07304	1.86699	1.01745	16.0401	12.8756	12.9021
BxW-97	73.918	101.684	92.5551	228.937	252.214	319.311	27.2685	29.7752	56.909	52.5179	59.0779	64.3307	12.5783	11.1296	14.6723	6.86755	5.80315	10.9225	2.07394	1.90777	1.13885	15.7408	11.6025	11.5765
BxW-98	75.0204	107.624	99.995	213.899	272.911	331.598	21.4296	37.7032	60.4289	52.497	59.0945	65.2131	11.0387	14.5056	14.0605	5.03972	8.12702	10.3269	2.66251	2.09776	1.12858	15.0895	8.74394	10.3866
BxW-99	70.6385	88.3186	79.446	239.737	209.355	340.535	20.8185	17.5677	52.6023	45.7262	56.9287	59.2922	13.2011	13.1602	17.8378	8.46807	8.39054	13.474	1.80336	1.54078	1.09222	16.3397	12.2698	12.0924
